# Supplementary material for: Structural Insights into the Host–Guest Complexation between β-Cyclodextrin and Bio-Conjugatable Adamantane Derivatives
Source: MDPI journal article supplement (doi:10.3390/molecules26092412), 2021-04-21

# checkCIF/PLATON report

You have not supplied any structure factors. As a result the full set of tests cannot be run.

THIS REPORT IS FOR GUIDANCE ONLY. IF USED AS PART OF A REVIEW PROCEDURE FOR PUBLICATION, IT SHOULD NOT REPLACE THE EXPERTISE OF AN EXPERIENCED CRYSTALLOGRAPHIC REFEREE.

No syntax errors found.      CIF dictionary      Interpreting this report

## Datablock: I

---

Bond precision:    C-C = 0.0094 A

Wavelength=0.71073

Cell:                a=15.2993(8)                b=15.4429(7)                c=18.0837(10)  
                      alpha=99.751(4)        beta=113.551(5)        gamma=102.813(4)  
Temperature:    150 K

|                | Calculated                                | Reported                                  |
|----------------|-------------------------------------------|-------------------------------------------|
| Volume         | 3656.6(4)                                 | 3656.6(4)                                 |
| Space group    | P 1                                       | P 1                                       |
| Hall group     | P 1                                       | P 1                                       |
| Moiety formula | 2(C42 H70 O35), C12 H16 O4<br>[+ solvent] | 2(C42 H70 O35), C12 H16 O4<br>[+ SOLVENT] |
| Sum formula    | C96 H156 O74 [+ solvent]                  | C96 H156 O74                              |
| Mr             | 2494.22                                   | 2494.20                                   |
| Dx,g cm-3      | 1.133                                     | 1.133                                     |
| Z              | 1                                         | 1                                         |
| Mu (mm-1)      | 0.099                                     | 0.099                                     |
| F000           | 1324.0                                    | 1324.0                                    |
| F000'          | 1324.97                                   |                                           |
| h,k,lmax       | 21,21,24                                  | 21,20,24                                  |
| Nref           | 40254[ 20127]                             | 21115                                     |
| Tmin,Tmax      | 0.991,0.992                               | 0.991,0.992                               |
| Tmin'          | 0.990                                     |                                           |

Correction method= # Reported T Limits: Tmin=0.991 Tmax=0.992

AbsCorr = MULTI-SCAN

Data completeness= 1.05/0.52

Theta(max)= 29.369

R(reflections)= 0.0758( 16593)

wR2(reflections)= 0.2305( 21115)

S = 1.027

Npar= 1676

---

The following ALERTS were generated. Each ALERT has the format

**test-name\_ALERT\_alert-type\_alert-level.**

Click on the hyperlinks for more details of the test.

### Alert level B

|                   |                                                 |              |
|-------------------|-------------------------------------------------|--------------|
| PLAT097_ALERT_2_B | Large Reported Max. (Positive) Residual Density | 1.04 eA-3    |
| PLAT415_ALERT_2_B | Short Inter D-H..H-X H53A ..H580 .              | 1.91 Ang.    |
|                   | -1+x,y,z =                                      | 1_455 Check  |
| PLAT415_ALERT_2_B | Short Inter D-H..H-X H54A ..H640 .              | 1.93 Ang.    |
|                   | -1+x,y,z =                                      | 1_455 Check  |
| PLAT420_ALERT_2_B | D-H Bond Without Acceptor O3 --H30 .            | Please Check |
| PLAT420_ALERT_2_B | D-H Bond Without Acceptor O6 --H60 .            | Please Check |
| PLAT420_ALERT_2_B | D-H Bond Without Acceptor O9 --H90 .            | Please Check |
| PLAT420_ALERT_2_B | D-H Bond Without Acceptor O13 --H130 .          | Please Check |
| PLAT420_ALERT_2_B | D-H Bond Without Acceptor O16 --H160 .          | Please Check |
| PLAT420_ALERT_2_B | D-H Bond Without Acceptor O23 --H230 .          | Please Check |
| PLAT420_ALERT_2_B | D-H Bond Without Acceptor O24 --H240 .          | Please Check |
| PLAT420_ALERT_2_B | D-H Bond Without Acceptor O26 --H260 .          | Please Check |
| PLAT420_ALERT_2_B | D-H Bond Without Acceptor O28 --H28 .           | Please Check |
| PLAT420_ALERT_2_B | D-H Bond Without Acceptor O34 --H340 .          | Please Check |
| PLAT420_ALERT_2_B | D-H Bond Without Acceptor O38 --H380 .          | Please Check |
| PLAT420_ALERT_2_B | D-H Bond Without Acceptor O39 --H390 .          | Please Check |
| PLAT420_ALERT_2_B | D-H Bond Without Acceptor O41 --H410 .          | Please Check |
| PLAT420_ALERT_2_B | D-H Bond Without Acceptor O43 --H430 .          | Please Check |
| PLAT420_ALERT_2_B | D-H Bond Without Acceptor O53 --H530 .          | Please Check |
| PLAT420_ALERT_2_B | D-H Bond Without Acceptor O56 --H560 .          | Please Check |
| PLAT420_ALERT_2_B | D-H Bond Without Acceptor O59 --H590 .          | Please Check |
| PLAT420_ALERT_2_B | D-H Bond Without Acceptor O63 --H630 .          | Please Check |
| PLAT420_ALERT_2_B | D-H Bond Without Acceptor O64 --H640 .          | Please Check |
| PLAT420_ALERT_2_B | D-H Bond Without Acceptor O66 --H660 .          | Please Check |
| PLAT420_ALERT_2_B | D-H Bond Without Acceptor O68 --H680 .          | Please Check |
| PLAT420_ALERT_2_B | D-H Bond Without Acceptor O74A --H74W .         | Please Check |

### Alert level C

|                   |                                                   |              |
|-------------------|---------------------------------------------------|--------------|
| DIFMX02_ALERT_1_C | The maximum difference density is > 0.1*ZMAX*0.75 |              |
|                   | The relevant atom site should be identified.      |              |
| STRVA01_ALERT_4_C | Flack test results are ambiguous.                 |              |
|                   | From the CIF: _refine_ls_abs_structure_Flack      | 0.600        |
|                   | From the CIF: _refine_ls_abs_structure_Flack_su   | 0.600        |
| PLAT094_ALERT_2_C | Ratio of Maximum / Minimum Residual Density ....  | 2.55 Report  |
| PLAT309_ALERT_2_C | Single Bonded Oxygen (C-O > 1.3 Ang) .....        | 072A Check   |
| PLAT340_ALERT_3_C | Low Bond Precision on C-C Bonds .....             | 0.00936 Ang. |
| PLAT415_ALERT_2_C | Short Inter D-H..H-X H540 ..H84A .                | 2.05 Ang.    |
|                   | x,1+y,z =                                         | 1_565 Check  |
| PLAT761_ALERT_1_C | CIF Contains no X-H Bonds .....                   | Please Check |
| PLAT762_ALERT_1_C | CIF Contains no X-Y-H or H-Y-H Angles .....       | Please Check |
| PLAT907_ALERT_2_C | Flack x > 0.5, Structure Needs to be Inverted? .  | 0.60 Check   |

### Alert level G

|                   |                                                  |              |
|-------------------|--------------------------------------------------|--------------|
| PLAT002_ALERT_2_G | Number of Distance or Angle Restraints on AtSite | 20 Note      |
| PLAT003_ALERT_2_G | Number of Uiso or Uij Restrained non-H Atoms ... | 32 Report    |
| PLAT007_ALERT_5_G | Number of Unrefined Donor-H Atoms .....          | 46 Report    |
| PLAT032_ALERT_4_G | Std. Uncertainty on Flack Parameter Value High . | 0.600 Report |
| PLAT066_ALERT_1_G | Predicted and Reported Tmin&Tmax Range Identical | ? Check      |
| PLAT175_ALERT_4_G | The CIF-Embedded .res File Contains SAME Records | 1 Report     |
| PLAT177_ALERT_4_G | The CIF-Embedded .res File Contains DELU Records | 1 Report     |
| PLAT178_ALERT_4_G | The CIF-Embedded .res File Contains SIMU Records | 1 Report     |
| PLAT302_ALERT_4_G | Anion/Solvent/Minor-Residue Disorder (Resd 3 )   | 100% Note    |

|                   |                                                |       |        |
|-------------------|------------------------------------------------|-------|--------|
| PLAT302_ALERT_4_G | Anion/Solvent/Minor-Residue Disorder (Resd 4 ) | 100%  | Note   |
| PLAT304_ALERT_4_G | Non-Integer Number of Atoms in ..... (Resd 3 ) | 16.42 | Check  |
| PLAT304_ALERT_4_G | Non-Integer Number of Atoms in ..... (Resd 4 ) | 15.58 | Check  |
| PLAT417_ALERT_2_G | Short Inter D-H...H-D H8O ..H73W .             | 1.98  | Ang.   |
|                   | x,l+y,z =                                      | 1_565 | Check  |
| PLAT606_ALERT_4_G | Solvent Accessible VOID(S) in Structure .....  | !     | Info   |
| PLAT720_ALERT_4_G | Number of Unusual/Non-Standard Labels .....    | 1     | Note   |
| PLAT791_ALERT_4_G | Model has Chirality at C2 (Sohnke SpGr)        | R     | Verify |
| PLAT791_ALERT_4_G | Model has Chirality at C3 (Sohnke SpGr)        | S     | Verify |
| PLAT791_ALERT_4_G | Model has Chirality at C4 (Sohnke SpGr)        | R     | Verify |
| PLAT791_ALERT_4_G | Model has Chirality at C5 (Sohnke SpGr)        | R     | Verify |
| PLAT791_ALERT_4_G | Model has Chirality at C6 (Sohnke SpGr)        | R     | Verify |
| PLAT791_ALERT_4_G | Model has Chirality at C8 (Sohnke SpGr)        | R     | Verify |
| PLAT791_ALERT_4_G | Model has Chirality at C9 (Sohnke SpGr)        | S     | Verify |
| PLAT791_ALERT_4_G | Model has Chirality at C10 (Sohnke SpGr)       | R     | Verify |
| PLAT791_ALERT_4_G | Model has Chirality at C11 (Sohnke SpGr)       | R     | Verify |
| PLAT791_ALERT_4_G | Model has Chirality at C12 (Sohnke SpGr)       | R     | Verify |
| PLAT791_ALERT_4_G | Model has Chirality at C14 (Sohnke SpGr)       | R     | Verify |
| PLAT791_ALERT_4_G | Model has Chirality at C15 (Sohnke SpGr)       | S     | Verify |
| PLAT791_ALERT_4_G | Model has Chirality at C16 (Sohnke SpGr)       | R     | Verify |
| PLAT791_ALERT_4_G | Model has Chirality at C17 (Sohnke SpGr)       | R     | Verify |
| PLAT791_ALERT_4_G | Model has Chirality at C18 (Sohnke SpGr)       | R     | Verify |
| PLAT791_ALERT_4_G | Model has Chirality at C20 (Sohnke SpGr)       | R     | Verify |
| PLAT791_ALERT_4_G | Model has Chirality at C21 (Sohnke SpGr)       | S     | Verify |
| PLAT791_ALERT_4_G | Model has Chirality at C22 (Sohnke SpGr)       | R     | Verify |
| PLAT791_ALERT_4_G | Model has Chirality at C23 (Sohnke SpGr)       | R     | Verify |
| PLAT791_ALERT_4_G | Model has Chirality at C24 (Sohnke SpGr)       | R     | Verify |
| PLAT791_ALERT_4_G | Model has Chirality at C26 (Sohnke SpGr)       | R     | Verify |
| PLAT791_ALERT_4_G | Model has Chirality at C27 (Sohnke SpGr)       | S     | Verify |
| PLAT791_ALERT_4_G | Model has Chirality at C28 (Sohnke SpGr)       | R     | Verify |
| PLAT791_ALERT_4_G | Model has Chirality at C29 (Sohnke SpGr)       | R     | Verify |
| PLAT791_ALERT_4_G | Model has Chirality at C30 (Sohnke SpGr)       | R     | Verify |
| PLAT791_ALERT_4_G | Model has Chirality at C32 (Sohnke SpGr)       | R     | Verify |
| PLAT791_ALERT_4_G | Model has Chirality at C33 (Sohnke SpGr)       | S     | Verify |
| PLAT791_ALERT_4_G | Model has Chirality at C34 (Sohnke SpGr)       | R     | Verify |
| PLAT791_ALERT_4_G | Model has Chirality at C35 (Sohnke SpGr)       | R     | Verify |
| PLAT791_ALERT_4_G | Model has Chirality at C36 (Sohnke SpGr)       | R     | Verify |
| PLAT791_ALERT_4_G | Model has Chirality at C38 (Sohnke SpGr)       | R     | Verify |
| PLAT791_ALERT_4_G | Model has Chirality at C39 (Sohnke SpGr)       | S     | Verify |
| PLAT791_ALERT_4_G | Model has Chirality at C40 (Sohnke SpGr)       | R     | Verify |
| PLAT791_ALERT_4_G | Model has Chirality at C41 (Sohnke SpGr)       | R     | Verify |
| PLAT791_ALERT_4_G | Model has Chirality at C42 (Sohnke SpGr)       | R     | Verify |
| PLAT791_ALERT_4_G | Model has Chirality at C44 (Sohnke SpGr)       | R     | Verify |
| PLAT791_ALERT_4_G | Model has Chirality at C45 (Sohnke SpGr)       | S     | Verify |
| PLAT791_ALERT_4_G | Model has Chirality at C46 (Sohnke SpGr)       | R     | Verify |
| PLAT791_ALERT_4_G | Model has Chirality at C47 (Sohnke SpGr)       | R     | Verify |
| PLAT791_ALERT_4_G | Model has Chirality at C48 (Sohnke SpGr)       | R     | Verify |
| PLAT791_ALERT_4_G | Model has Chirality at C50 (Sohnke SpGr)       | R     | Verify |
| PLAT791_ALERT_4_G | Model has Chirality at C51 (Sohnke SpGr)       | S     | Verify |
| PLAT791_ALERT_4_G | Model has Chirality at C52 (Sohnke SpGr)       | R     | Verify |
| PLAT791_ALERT_4_G | Model has Chirality at C53 (Sohnke SpGr)       | R     | Verify |
| PLAT791_ALERT_4_G | Model has Chirality at C54 (Sohnke SpGr)       | R     | Verify |
| PLAT791_ALERT_4_G | Model has Chirality at C56 (Sohnke SpGr)       | R     | Verify |
| PLAT791_ALERT_4_G | Model has Chirality at C57 (Sohnke SpGr)       | S     | Verify |
| PLAT791_ALERT_4_G | Model has Chirality at C58 (Sohnke SpGr)       | R     | Verify |
| PLAT791_ALERT_4_G | Model has Chirality at C59 (Sohnke SpGr)       | R     | Verify |
| PLAT791_ALERT_4_G | Model has Chirality at C60 (Sohnke SpGr)       | R     | Verify |
| PLAT791_ALERT_4_G | Model has Chirality at C62 (Sohnke SpGr)       | R     | Verify |
| PLAT791_ALERT_4_G | Model has Chirality at C63 (Sohnke SpGr)       | S     | Verify |
| PLAT791_ALERT_4_G | Model has Chirality at C64 (Sohnke SpGr)       | R     | Verify |
| PLAT791_ALERT_4_G | Model has Chirality at C65 (Sohnke SpGr)       | R     | Verify |
| PLAT791_ALERT_4_G | Model has Chirality at C66 (Sohnke SpGr)       | R     | Verify |

|                                                                    |               |              |
|--------------------------------------------------------------------|---------------|--------------|
| PLAT791_ALERT_4_G Model has Chirality at C68                       | (Sohnke SpGr) | R Verify     |
| PLAT791_ALERT_4_G Model has Chirality at C69                       | (Sohnke SpGr) | S Verify     |
| PLAT791_ALERT_4_G Model has Chirality at C70                       | (Sohnke SpGr) | R Verify     |
| PLAT791_ALERT_4_G Model has Chirality at C71                       | (Sohnke SpGr) | R Verify     |
| PLAT791_ALERT_4_G Model has Chirality at C72                       | (Sohnke SpGr) | R Verify     |
| PLAT791_ALERT_4_G Model has Chirality at C74                       | (Sohnke SpGr) | R Verify     |
| PLAT791_ALERT_4_G Model has Chirality at C75                       | (Sohnke SpGr) | S Verify     |
| PLAT791_ALERT_4_G Model has Chirality at C76                       | (Sohnke SpGr) | R Verify     |
| PLAT791_ALERT_4_G Model has Chirality at C77                       | (Sohnke SpGr) | R Verify     |
| PLAT791_ALERT_4_G Model has Chirality at C78                       | (Sohnke SpGr) | R Verify     |
| PLAT791_ALERT_4_G Model has Chirality at C80                       | (Sohnke SpGr) | R Verify     |
| PLAT791_ALERT_4_G Model has Chirality at C81                       | (Sohnke SpGr) | S Verify     |
| PLAT791_ALERT_4_G Model has Chirality at C82                       | (Sohnke SpGr) | R Verify     |
| PLAT791_ALERT_4_G Model has Chirality at C83                       | (Sohnke SpGr) | R Verify     |
| PLAT791_ALERT_4_G Model has Chirality at C84                       | (Sohnke SpGr) | R Verify     |
| PLAT791_ALERT_4_G Model has Chirality at C93A                      | (Sohnke SpGr) | R Verify     |
| PLAT791_ALERT_4_G Model has Chirality at C95A                      | (Sohnke SpGr) | S Verify     |
| PLAT860_ALERT_3_G Number of Least-Squares Restraints .....         |               | 447 Note     |
| PLAT869_ALERT_4_G ALERTS Related to the Use of SQUEEZE Suppressed  |               | ! Info       |
| PLAT883_ALERT_1_G No Info/Value for _atom_sites_solution_primary . |               | Please Do !  |
| PLAT941_ALERT_3_G Average HKL Measurement Multiplicity .....       |               | 1.6 Low      |
| PLAT965_ALERT_2_G The SHELXL WEIGHT Optimisation has not Converged |               | Please Check |

---

0 **ALERT level A** = Most likely a serious problem - resolve or explain  
25 **ALERT level B** = A potentially serious problem, consider carefully  
9 **ALERT level C** = Check. Ensure it is not caused by an omission or oversight  
92 **ALERT level G** = General information/check it is not something unexpected

5 ALERT type 1 CIF construction/syntax error, inconsistent or missing data  
33 ALERT type 2 Indicator that the structure model may be wrong or deficient  
3 ALERT type 3 Indicator that the structure quality may be low  
84 ALERT type 4 Improvement, methodology, query or suggestion  
1 ALERT type 5 Informative message, check

---

## checkCIF publication errors

---

### Alert level A

PUBL004\_ALERT\_1\_A The contact author's name and address are missing,  
    \_publ\_contact\_author\_name and \_publ\_contact\_author\_address.  
PUBL005\_ALERT\_1\_A \_publ\_contact\_author\_email, \_publ\_contact\_author\_fax and  
    \_publ\_contact\_author\_phone are all missing.  
    At least one of these should be present.  
PUBL006\_ALERT\_1\_A \_publ\_requested\_journal is missing  
    e.g. 'Acta Crystallographica Section C'  
PUBL008\_ALERT\_1\_A \_publ\_section\_title is missing. Title of paper.  
PUBL009\_ALERT\_1\_A \_publ\_author\_name is missing. List of author(s) name(s).  
PUBL010\_ALERT\_1\_A \_publ\_author\_address is missing. Author(s) address(es).  
PUBL012\_ALERT\_1\_A \_publ\_section\_abstract is missing.  
    Abstract of paper in English.

---

### Alert level G

PUBL017\_ALERT\_1\_G The \_publ\_section\_references section is missing or  
    empty.

---

7 **ALERT level A** = Data missing that is essential or data in wrong format  
1 **ALERT level G** = General alerts. Data that may be required is missing

---

## Publication of your CIF

You should attempt to resolve as many as possible of the alerts in all categories. Often the minor alerts point to easily fixed oversights, errors and omissions in your CIF or refinement strategy, so attention to these fine details can be worthwhile. In order to resolve some of the more serious problems it may be necessary to carry out additional measurements or structure refinements. However, the nature of your study may justify the reported deviations from journal submission requirements and the more serious of these should be commented upon in the discussion or experimental section of a paper or in the "special\_details" fields of the CIF. *checkCIF* was carefully designed to identify outliers and unusual parameters, but every test has its limitations and alerts that are not important in a particular case may appear. Conversely, the absence of alerts does not guarantee there are no aspects of the results needing attention. It is up to the individual to critically assess their own results and, if necessary, seek expert advice.

If level A alerts remain, which you believe to be justified deviations, and you intend to submit this CIF for publication in a journal, you should additionally insert an explanation in your CIF using the Validation Reply Form (VRF) below. This will allow your explanation to be considered as part of the review process.

## Validation response form

Please find below a validation response form (VRF) that can be filled in and pasted into your CIF.

```
# start Validation Reply Form
_vrf_PUBL004_GLOBAL
;
PROBLEM: The contact author's name and address are missing,
RESPONSE: ...
;
_vrf_PUBL005_GLOBAL
;
PROBLEM: _publ_contact_author_email, _publ_contact_author_fax and
RESPONSE: ...
;
_vrf_PUBL006_GLOBAL
;
PROBLEM: _publ_requested_journal is missing
RESPONSE: ...
;
_vrf_PUBL008_GLOBAL
;
PROBLEM: _publ_section_title is missing. Title of paper.
RESPONSE: ...
;
_vrf_PUBL009_GLOBAL
;
PROBLEM: _publ_author_name is missing. List of author(s) name(s).
RESPONSE: ...
;
_vrf_PUBL010_GLOBAL
;
PROBLEM: _publ_author_address is missing. Author(s) address(es).
```

```

RESPONSE: ...
;
_vrf_PUBL012_GLOBAL
;
PROBLEM: _publ_section_abstract is missing.
RESPONSE: ...
;
# end Validation Reply Form

```

If you wish to submit your CIF for publication in Acta Crystallographica Section C or E, you should upload your CIF via the web. If you wish to submit your CIF for publication in IUCrData you should upload your CIF via the web. If your CIF is to form part of a submission to another IUCr journal, you will be asked, either during electronic submission or by the Co-editor handling your paper, to upload your CIF via our web site.

---

**PLATON version of 22/03/2021; check.def file version of 19/03/2021**

Datablock I - ellipsoid plot

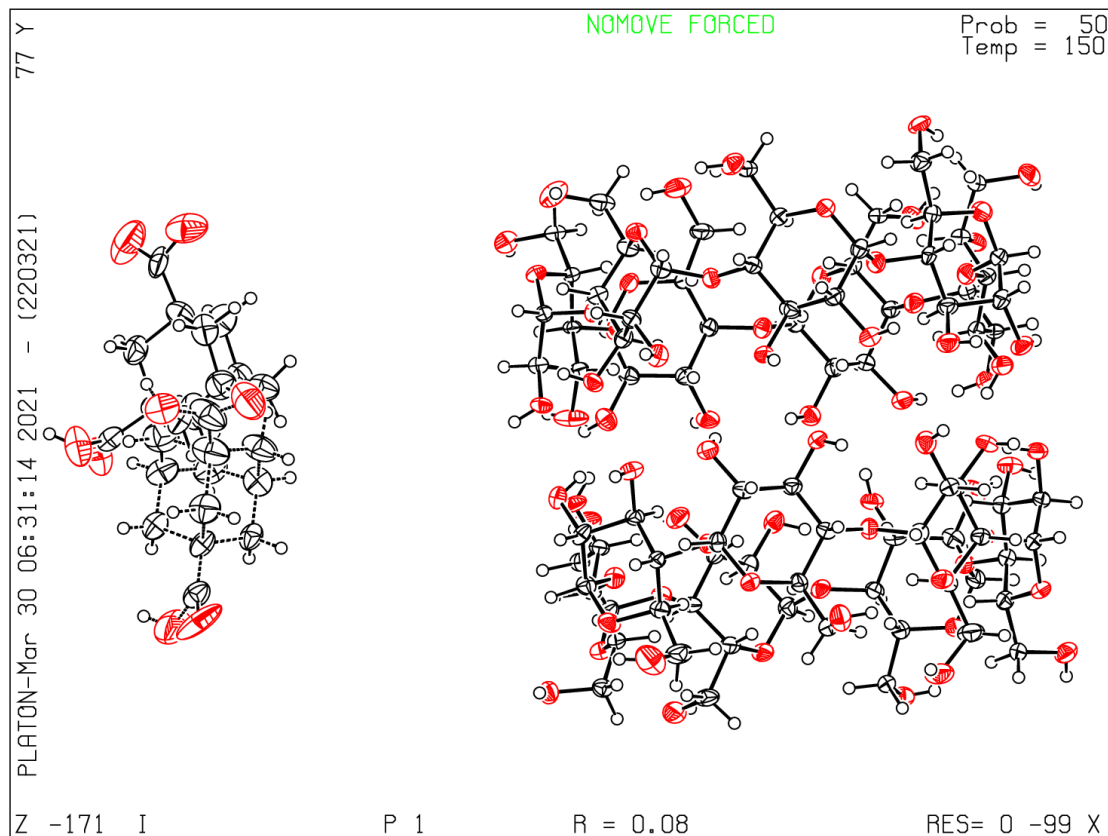

Supplement: s1 [file s1]
