# Supplementary material for: Structural Insights into the Host–Guest Complexation between β-Cyclodextrin and Bio-Conjugatable Adamantane Derivatives
Source: MDPI journal article supplement (doi:10.3390/molecules26092412), 2021-04-21

# checkCIF/PLATON report

You have not supplied any structure factors. As a result the full set of tests cannot be run.

THIS REPORT IS FOR GUIDANCE ONLY. IF USED AS PART OF A REVIEW PROCEDURE FOR PUBLICATION, IT SHOULD NOT REPLACE THE EXPERTISE OF AN EXPERIENCED CRYSTALLOGRAPHIC REFEREE.

No syntax errors found.      CIF dictionary      Interpreting this report

## Datablock: I

---

Bond precision:    C-C = 0.0075 Å                      Wavelength=1.54184

Cell:                      a=19.2469(5)              b=23.9691(5)              c=32.5978(9)  
                            alpha=90              beta=90              gamma=90  
Temperature:              173 K

|                        | Calculated                                          | Reported          |
|------------------------|-----------------------------------------------------|-------------------|
| Volume                 | 15038.4(7)                                          | 15038.4(7)        |
| Space group            | C 2 2 21                                            | C 2 2 21          |
| Hall group             | C 2c 2                                              | C 2c 2            |
| Moiety formula         | 2(C42 H21 O35), C10 H2 N,<br>0.2(C10 N) [+ solvent] | ?                 |
| Sum formula            | C96 H44 N1.20 O70 [+<br>solvent]                    | C96 H44 N1.20 O70 |
| Mr                     | 2334.13                                             | 2334.12           |
| Dx, g cm <sup>-3</sup> | 1.031                                               | 1.031             |
| Z                      | 4                                                   | 4                 |
| Mu (mm <sup>-1</sup> ) | 0.802                                               | 0.802             |
| F000                   | 4753.6                                              | 4754.0            |
| F000'                  | 4773.98                                             |                   |
| h,k,lmax               | 22,28,38                                            | 22,28,38          |
| Nref                   | 13325[ 7176]                                        | 13298             |
| Tmin,Tmax              | 0.908,0.938                                         | 0.222,0.318       |
| Tmin'                  | 0.908                                               |                   |

Correction method= # Reported T Limits: Tmin=0.222 Tmax=0.318  
AbsCorr = MULTI-SCAN

Data completeness= 1.85/1.00                      Theta(max)= 66.708

R(reflections)= 0.0802( 12601)              wR2(reflections)= 0.2320( 13298)

S = 2.014                      Npar= 773

---

The following ALERTS were generated. Each ALERT has the format

**test-name\_ALERT\_alert-type\_alert-level.**

Click on the hyperlinks for more details of the test.

---

### ● Alert level B

|                   |                                                  |              |
|-------------------|--------------------------------------------------|--------------|
| PLAT097_ALERT_2_B | Large Reported Max. (Positive) Residual Density  | 1.30 eA-3    |
| PLAT250_ALERT_2_B | Large U3/U1 Ratio for Average U(i,j) Tensor .... | 4.4 Note     |
| PLAT416_ALERT_2_B | Short Intra D-H..H-D H8 ..H14 .                  | 1.65 Ang.    |
|                   | x,y,z =                                          | 1_555 Check  |
| PLAT417_ALERT_2_B | Short Inter D-H..H-D H3 ..H9 .                   | 2.09 Ang.    |
|                   | 1-x,y,3/2-z =                                    | 4_656 Check  |
| PLAT417_ALERT_2_B | Short Inter D-H..H-D H6 ..H26 .                  | 1.89 Ang.    |
|                   | -1/2+x,-1/2+y,z =                                | 5_445 Check  |
| PLAT417_ALERT_2_B | Short Inter D-H..H-D H9 ..H9 .                   | 2.02 Ang.    |
|                   | 1-x,y,3/2-z =                                    | 4_656 Check  |
| PLAT417_ALERT_2_B | Short Inter D-H..H-D H19 ..H28 .                 | 2.04 Ang.    |
|                   | 1-x,y,3/2-z =                                    | 4_656 Check  |
| PLAT420_ALERT_2_B | D-H Bond Without Acceptor O1 --H1 .              | Please Check |
| PLAT420_ALERT_2_B | D-H Bond Without Acceptor O6 --H6 .              | Please Check |
| PLAT420_ALERT_2_B | D-H Bond Without Acceptor O16 --H16 .            | Please Check |
| PLAT420_ALERT_2_B | D-H Bond Without Acceptor O21 --H21 .            | Please Check |
| PLAT420_ALERT_2_B | D-H Bond Without Acceptor O33 --H33 .            | Please Check |

---

### ● Alert level C

ABSTY02\_ALERT\_1\_C An \_exptl\_absorpt\_correction\_type has been given without  
a literature citation. This should be contained in the  
\_exptl\_absorpt\_process\_details field.  
Absorption correction given as multi-scan

DIFMX02\_ALERT\_1\_C The maximum difference density is > 0.1\*ZMAX\*0.75  
The relevant atom site should be identified.

GOODF01\_ALERT\_2\_C The least squares goodness of fit parameter lies  
outside the range 0.80 <> 2.00  
Goodness of fit given = 2.014

|                   |                                                  |              |
|-------------------|--------------------------------------------------|--------------|
| PLAT048_ALERT_1_C | MoietyFormula Not Given (or Incomplete) .....    | Please Check |
| PLAT077_ALERT_4_C | Unitcell Contains Non-integer Number of Atoms .. | Please Check |
| PLAT085_ALERT_2_C | SHELXL Default Weighting Scheme is not Optimized | Please Check |
| PLAT087_ALERT_2_C | Unsatisfactory S value (Too High) .....          | 2.01 Check   |
| PLAT094_ALERT_2_C | Ratio of Maximum / Minimum Residual Density .... | 2.25 Report  |
| PLAT220_ALERT_2_C | NonSolvent Resd 1 O Ueq(max)/Ueq(min) Range      | 3.6 Ratio    |
| PLAT230_ALERT_2_C | Hirshfeld Test Diff for O31 --C37 .              | 5.1 s.u.     |
| PLAT250_ALERT_2_C | Large U3/U1 Ratio for Average U(i,j) Tensor .... | 2.2 Note     |
| PLAT340_ALERT_3_C | Low Bond Precision on C-C Bonds .....            | 0.00754 Ang. |
| PLAT417_ALERT_2_C | Short Inter D-H..H-D H23 ..H24 .                 | 2.10 Ang.    |
|                   | 1-x,y,3/2-z =                                    | 4_656 Check  |
| PLAT420_ALERT_2_C | D-H Bond Without Acceptor N1 --H1B .             | Please Check |

---

### ● Alert level G

|                   |                                                  |           |
|-------------------|--------------------------------------------------|-----------|
| PLAT002_ALERT_2_G | Number of Distance or Angle Restraints on AtSite | 22 Note   |
| PLAT007_ALERT_5_G | Number of Unrefined Donor-H Atoms .....          | 23 Report |
| PLAT171_ALERT_4_G | The CIF-Embedded .res File Contains EADP Records | 2 Report  |
| PLAT175_ALERT_4_G | The CIF-Embedded .res File Contains SAME Records | 1 Report  |
| PLAT300_ALERT_4_G | Atom Site Occupancy of N1 Constrained at         | 0.5 Check |
| PLAT300_ALERT_4_G | Atom Site Occupancy of C43 Constrained at        | 0.5 Check |
| PLAT300_ALERT_4_G | Atom Site Occupancy of C44 Constrained at        | 0.5 Check |
| PLAT300_ALERT_4_G | Atom Site Occupancy of C45 Constrained at        | 0.5 Check |
| PLAT300_ALERT_4_G | Atom Site Occupancy of C46 Constrained at        | 0.5 Check |
| PLAT300_ALERT_4_G | Atom Site Occupancy of C47 Constrained at        | 0.5 Check |
| PLAT300_ALERT_4_G | Atom Site Occupancy of C48 Constrained at        | 0.5 Check |

|                   |                                                  |                |      |       |
|-------------------|--------------------------------------------------|----------------|------|-------|
| PLAT300_ALERT_4_G | Atom Site Occupancy of C49                       | Constrained at | 0.5  | Check |
| PLAT300_ALERT_4_G | Atom Site Occupancy of C50                       | Constrained at | 0.5  | Check |
| PLAT300_ALERT_4_G | Atom Site Occupancy of C51                       | Constrained at | 0.5  | Check |
| PLAT300_ALERT_4_G | Atom Site Occupancy of C52                       | Constrained at | 0.5  | Check |
| PLAT300_ALERT_4_G | Atom Site Occupancy of H1A                       | Constrained at | 0.5  | Check |
| PLAT300_ALERT_4_G | Atom Site Occupancy of H1B                       | Constrained at | 0.5  | Check |
| PLAT300_ALERT_4_G | Atom Site Occupancy of N2                        | Constrained at | 0.1  | Check |
| PLAT300_ALERT_4_G | Atom Site Occupancy of C53                       | Constrained at | 0.1  | Check |
| PLAT300_ALERT_4_G | Atom Site Occupancy of C54                       | Constrained at | 0.1  | Check |
| PLAT300_ALERT_4_G | Atom Site Occupancy of C55                       | Constrained at | 0.1  | Check |
| PLAT300_ALERT_4_G | Atom Site Occupancy of C56                       | Constrained at | 0.1  | Check |
| PLAT300_ALERT_4_G | Atom Site Occupancy of C57                       | Constrained at | 0.1  | Check |
| PLAT300_ALERT_4_G | Atom Site Occupancy of C58                       | Constrained at | 0.1  | Check |
| PLAT300_ALERT_4_G | Atom Site Occupancy of C59                       | Constrained at | 0.1  | Check |
| PLAT300_ALERT_4_G | Atom Site Occupancy of C60                       | Constrained at | 0.1  | Check |
| PLAT300_ALERT_4_G | Atom Site Occupancy of C61                       | Constrained at | 0.1  | Check |
| PLAT300_ALERT_4_G | Atom Site Occupancy of C62                       | Constrained at | 0.1  | Check |
| PLAT302_ALERT_4_G | Anion/Solvent/Minor-Residue Disorder (Resd 2 )   |                | 100% | Note  |
| PLAT302_ALERT_4_G | Anion/Solvent/Minor-Residue Disorder (Resd 3 )   |                | 100% | Note  |
| PLAT304_ALERT_4_G | Non-Integer Number of Atoms in ..... (Resd 2 )   |                | 6.50 | Check |
| PLAT304_ALERT_4_G | Non-Integer Number of Atoms in ..... (Resd 3 )   |                | 1.10 | Check |
| PLAT315_ALERT_2_G | Singly Bonded Carbon Detected (H-atoms Missing). |                | C51  | Check |
| PLAT315_ALERT_2_G | Singly Bonded Carbon Detected (H-atoms Missing). |                | C61  | Check |
| PLAT343_ALERT_2_G | Unusual sp? Angle Range in Main Residue for      |                | C1   | Check |
| PLAT343_ALERT_2_G | Unusual sp? Angle Range in Main Residue for      |                | C2   | Check |
| PLAT343_ALERT_2_G | Unusual sp? Angle Range in Main Residue for      |                | C3   | Check |
| PLAT343_ALERT_2_G | Unusual sp? Angle Range in Main Residue for      |                | C4   | Check |
| PLAT343_ALERT_2_G | Unusual sp? Angle Range in Main Residue for      |                | C5   | Check |
| PLAT343_ALERT_2_G | Unusual sp? Angle Range in Main Residue for      |                | C6   | Check |
| PLAT343_ALERT_2_G | Unusual sp? Angle Range in Main Residue for      |                | C7   | Check |
| PLAT343_ALERT_2_G | Unusual sp? Angle Range in Main Residue for      |                | C8   | Check |
| PLAT343_ALERT_2_G | Unusual sp? Angle Range in Main Residue for      |                | C9   | Check |
| PLAT343_ALERT_2_G | Unusual sp? Angle Range in Main Residue for      |                | C10  | Check |
| PLAT343_ALERT_2_G | Unusual sp? Angle Range in Main Residue for      |                | C11  | Check |
| PLAT343_ALERT_2_G | Unusual sp? Angle Range in Main Residue for      |                | C12  | Check |
| PLAT343_ALERT_2_G | Unusual sp? Angle Range in Main Residue for      |                | C13  | Check |
| PLAT343_ALERT_2_G | Unusual sp? Angle Range in Main Residue for      |                | C14  | Check |
| PLAT343_ALERT_2_G | Unusual sp? Angle Range in Main Residue for      |                | C15  | Check |
| PLAT343_ALERT_2_G | Unusual sp? Angle Range in Main Residue for      |                | C16  | Check |
| PLAT343_ALERT_2_G | Unusual sp? Angle Range in Main Residue for      |                | C17  | Check |
| PLAT343_ALERT_2_G | Unusual sp? Angle Range in Main Residue for      |                | C18  | Check |
| PLAT343_ALERT_2_G | Unusual sp? Angle Range in Main Residue for      |                | C19  | Check |
| PLAT343_ALERT_2_G | Unusual sp? Angle Range in Main Residue for      |                | C20  | Check |
| PLAT343_ALERT_2_G | Unusual sp? Angle Range in Main Residue for      |                | C21  | Check |
| PLAT343_ALERT_2_G | Unusual sp? Angle Range in Main Residue for      |                | C22  | Check |
| PLAT343_ALERT_2_G | Unusual sp? Angle Range in Main Residue for      |                | C23  | Check |
| PLAT343_ALERT_2_G | Unusual sp? Angle Range in Main Residue for      |                | C24  | Check |
| PLAT343_ALERT_2_G | Unusual sp? Angle Range in Main Residue for      |                | C25  | Check |
| PLAT343_ALERT_2_G | Unusual sp? Angle Range in Main Residue for      |                | C26  | Check |
| PLAT343_ALERT_2_G | Unusual sp? Angle Range in Main Residue for      |                | C27  | Check |
| PLAT343_ALERT_2_G | Unusual sp? Angle Range in Main Residue for      |                | C28  | Check |
| PLAT343_ALERT_2_G | Unusual sp? Angle Range in Main Residue for      |                | C29  | Check |
| PLAT343_ALERT_2_G | Unusual sp? Angle Range in Main Residue for      |                | C30  | Check |
| PLAT343_ALERT_2_G | Unusual sp? Angle Range in Main Residue for      |                | C31  | Check |
| PLAT343_ALERT_2_G | Unusual sp? Angle Range in Main Residue for      |                | C32  | Check |
| PLAT343_ALERT_2_G | Unusual sp? Angle Range in Main Residue for      |                | C33  | Check |
| PLAT343_ALERT_2_G | Unusual sp? Angle Range in Main Residue for      |                | C34  | Check |
| PLAT343_ALERT_2_G | Unusual sp? Angle Range in Main Residue for      |                | C35  | Check |
| PLAT343_ALERT_2_G | Unusual sp? Angle Range in Main Residue for      |                | C36  | Check |
| PLAT343_ALERT_2_G | Unusual sp? Angle Range in Main Residue for      |                | C37  | Check |
| PLAT343_ALERT_2_G | Unusual sp? Angle Range in Main Residue for      |                | C38  | Check |
| PLAT343_ALERT_2_G | Unusual sp? Angle Range in Main Residue for      |                | C39  | Check |

|                   |                                                  |                                 |        |        |
|-------------------|--------------------------------------------------|---------------------------------|--------|--------|
| PLAT343_ALERT_2_G | Unusual sp?                                      | Angle Range in Main Residue for | C40    | Check  |
| PLAT343_ALERT_2_G | Unusual sp?                                      | Angle Range in Main Residue for | C41    | Check  |
| PLAT343_ALERT_2_G | Unusual sp?                                      | Angle Range in Main Residue for | C42    | Check  |
| PLAT367_ALERT_2_G | Long?                                            | C(sp?)-C(sp?) Bond C1 - C2      | 1.52   | Ang.   |
| PLAT367_ALERT_2_G | Long?                                            | C(sp?)-C(sp?) Bond C2 - C3      | 1.53   | Ang.   |
| PLAT367_ALERT_2_G | Long?                                            | C(sp?)-C(sp?) Bond C3 - C4      | 1.52   | Ang.   |
| PLAT367_ALERT_2_G | Long?                                            | C(sp?)-C(sp?) Bond C4 - C5      | 1.53   | Ang.   |
| PLAT367_ALERT_2_G | Long?                                            | C(sp?)-C(sp?) Bond C5 - C6      | 1.51   | Ang.   |
| PLAT367_ALERT_2_G | Long?                                            | C(sp?)-C(sp?) Bond C7 - C8      | 1.50   | Ang.   |
| PLAT367_ALERT_2_G | Long?                                            | C(sp?)-C(sp?) Bond C8 - C9      | 1.54   | Ang.   |
| PLAT367_ALERT_2_G | Long?                                            | C(sp?)-C(sp?) Bond C9 - C10     | 1.51   | Ang.   |
| PLAT367_ALERT_2_G | Long?                                            | C(sp?)-C(sp?) Bond C10 - C11    | 1.50   | Ang.   |
| PLAT367_ALERT_2_G | Long?                                            | C(sp?)-C(sp?) Bond C11 - C12    | 1.53   | Ang.   |
| PLAT367_ALERT_2_G | Long?                                            | C(sp?)-C(sp?) Bond C13 - C14    | 1.52   | Ang.   |
| PLAT367_ALERT_2_G | Long?                                            | C(sp?)-C(sp?) Bond C14 - C15    | 1.53   | Ang.   |
| PLAT367_ALERT_2_G | Long?                                            | C(sp?)-C(sp?) Bond C15 - C16    | 1.52   | Ang.   |
| PLAT367_ALERT_2_G | Long?                                            | C(sp?)-C(sp?) Bond C16 - C17    | 1.52   | Ang.   |
| PLAT367_ALERT_2_G | Long?                                            | C(sp?)-C(sp?) Bond C17 - C18    | 1.52   | Ang.   |
| PLAT367_ALERT_2_G | Long?                                            | C(sp?)-C(sp?) Bond C19 - C20    | 1.51   | Ang.   |
| PLAT367_ALERT_2_G | Long?                                            | C(sp?)-C(sp?) Bond C20 - C21    | 1.54   | Ang.   |
| PLAT367_ALERT_2_G | Long?                                            | C(sp?)-C(sp?) Bond C21 - C22    | 1.51   | Ang.   |
| PLAT367_ALERT_2_G | Long?                                            | C(sp?)-C(sp?) Bond C22 - C23    | 1.51   | Ang.   |
| PLAT367_ALERT_2_G | Long?                                            | C(sp?)-C(sp?) Bond C23 - C24    | 1.53   | Ang.   |
| PLAT367_ALERT_2_G | Long?                                            | C(sp?)-C(sp?) Bond C25 - C26    | 1.52   | Ang.   |
| PLAT367_ALERT_2_G | Long?                                            | C(sp?)-C(sp?) Bond C26 - C27    | 1.52   | Ang.   |
| PLAT367_ALERT_2_G | Long?                                            | C(sp?)-C(sp?) Bond C27 - C28    | 1.52   | Ang.   |
| PLAT367_ALERT_2_G | Long?                                            | C(sp?)-C(sp?) Bond C28 - C29    | 1.53   | Ang.   |
| PLAT367_ALERT_2_G | Long?                                            | C(sp?)-C(sp?) Bond C29 - C30    | 1.54   | Ang.   |
| PLAT367_ALERT_2_G | Long?                                            | C(sp?)-C(sp?) Bond C31 - C32    | 1.53   | Ang.   |
| PLAT367_ALERT_2_G | Long?                                            | C(sp?)-C(sp?) Bond C32 - C33    | 1.52   | Ang.   |
| PLAT367_ALERT_2_G | Long?                                            | C(sp?)-C(sp?) Bond C33 - C34    | 1.52   | Ang.   |
| PLAT367_ALERT_2_G | Long?                                            | C(sp?)-C(sp?) Bond C34 - C35    | 1.52   | Ang.   |
| PLAT367_ALERT_2_G | Long?                                            | C(sp?)-C(sp?) Bond C35 - C36    | 1.52   | Ang.   |
| PLAT367_ALERT_2_G | Long?                                            | C(sp?)-C(sp?) Bond C37 - C38    | 1.52   | Ang.   |
| PLAT367_ALERT_2_G | Long?                                            | C(sp?)-C(sp?) Bond C38 - C39    | 1.55   | Ang.   |
| PLAT367_ALERT_2_G | Long?                                            | C(sp?)-C(sp?) Bond C39 - C40    | 1.51   | Ang.   |
| PLAT367_ALERT_2_G | Long?                                            | C(sp?)-C(sp?) Bond C40 - C41    | 1.51   | Ang.   |
| PLAT367_ALERT_2_G | Long?                                            | C(sp?)-C(sp?) Bond C41 - C42    | 1.52   | Ang.   |
| PLAT606_ALERT_4_G | Solvent Accessible VOID(S) in Structure .....    |                                 | !      | Info   |
| PLAT773_ALERT_2_G | Check long C-C Bond in CIF: C50 --C51            |                                 | 1.77   | Ang.   |
| PLAT773_ALERT_2_G | Check long C-C Bond in CIF: C60 --C61            |                                 | 1.77   | Ang.   |
| PLAT789_ALERT_4_G | Atoms with Negative _atom_site_disorder_group #  |                                 | 11     | Check  |
| PLAT791_ALERT_4_G | Model has Chirality at C43 (Sohnke SpGr)         |                                 | R      | Verify |
| PLAT860_ALERT_3_G | Number of Least-Squares Restraints .....         |                                 | 34     | Note   |
| PLAT869_ALERT_4_G | ALERTS Related to the Use of SQUEEZE Suppressed  |                                 | !      | Info   |
| PLAT883_ALERT_1_G | No Info/Value for _atom_sites_solution_primary . |                                 | Please | Do !   |
| PLAT965_ALERT_2_G | The SHELXL WEIGHT Optimisation has not Converged |                                 | Please | Check  |

---

0 **ALERT level A** = Most likely a serious problem - resolve or explain  
 12 **ALERT level B** = A potentially serious problem, consider carefully  
 14 **ALERT level C** = Check. Ensure it is not caused by an omission or oversight  
 120 **ALERT level G** = General information/check it is not something unexpected

4 **ALERT type 1** CIF construction/syntax error, inconsistent or missing data  
 104 **ALERT type 2** Indicator that the structure model may be wrong or deficient  
 2 **ALERT type 3** Indicator that the structure quality may be low  
 35 **ALERT type 4** Improvement, methodology, query or suggestion  
 1 **ALERT type 5** Informative message, check

---

# checkCIF publication errors

---

## Alert level A

PUBL004\_ALERT\_1\_A The contact author's name and address are missing,  
\_publ\_contact\_author\_name and \_publ\_contact\_author\_address.  
PUBL005\_ALERT\_1\_A \_publ\_contact\_author\_email, \_publ\_contact\_author\_fax and  
\_publ\_contact\_author\_phone are all missing.  
At least one of these should be present.  
PUBL006\_ALERT\_1\_A \_publ\_requested\_journal is missing  
e.g. 'Acta Crystallographica Section C'  
PUBL008\_ALERT\_1\_A \_publ\_section\_title is missing. Title of paper.  
PUBL009\_ALERT\_1\_A \_publ\_author\_name is missing. List of author(s) name(s).  
PUBL010\_ALERT\_1\_A \_publ\_author\_address is missing. Author(s) address(es).  
PUBL012\_ALERT\_1\_A \_publ\_section\_abstract is missing.  
Abstract of paper in English.

---

## Alert level G

PUBL017\_ALERT\_1\_G The \_publ\_section\_references section is missing or  
empty.

---

7 **ALERT level A** = Data missing that is essential or data in wrong format  
1 **ALERT level G** = General alerts. Data that may be required is missing

---

## Publication of your CIF

You should attempt to resolve as many as possible of the alerts in all categories. Often the minor alerts point to easily fixed oversights, errors and omissions in your CIF or refinement strategy, so attention to these fine details can be worthwhile. In order to resolve some of the more serious problems it may be necessary to carry out additional measurements or structure refinements. However, the nature of your study may justify the reported deviations from journal submission requirements and the more serious of these should be commented upon in the discussion or experimental section of a paper or in the "special\_details" fields of the CIF. *checkCIF* was carefully designed to identify outliers and unusual parameters, but every test has its limitations and alerts that are not important in a particular case may appear. Conversely, the absence of alerts does not guarantee there are no aspects of the results needing attention. It is up to the individual to critically assess their own results and, if necessary, seek expert advice.

If level A alerts remain, which you believe to be justified deviations, and you intend to submit this CIF for publication in a journal, you should additionally insert an explanation in your CIF using the Validation Reply Form (VRF) below. This will allow your explanation to be considered as part of the review process.

## Validation response form

Please find below a validation response form (VRF) that can be filled in and pasted into your CIF.

```
# start Validation Reply Form
_vrf_PUBL004_GLOBAL
;
PROBLEM: The contact author's name and address are missing,
```

```

RESPONSE: ...
;
_vrf_PUBL005_GLOBAL
;
PROBLEM: _publ_contact_author_email, _publ_contact_author_fax and
RESPONSE: ...
;
_vrf_PUBL006_GLOBAL
;
PROBLEM: _publ_requested_journal is missing
RESPONSE: ...
;
_vrf_PUBL008_GLOBAL
;
PROBLEM: _publ_section_title is missing. Title of paper.
RESPONSE: ...
;
_vrf_PUBL009_GLOBAL
;
PROBLEM: _publ_author_name is missing. List of author(s) name(s).
RESPONSE: ...
;
_vrf_PUBL010_GLOBAL
;
PROBLEM: _publ_author_address is missing. Author(s) address(es).
RESPONSE: ...
;
_vrf_PUBL012_GLOBAL
;
PROBLEM: _publ_section_abstract is missing.
RESPONSE: ...
;
# end Validation Reply Form

```

If you wish to submit your CIF for publication in Acta Crystallographica Section C or E, you should upload your CIF via the web. If you wish to submit your CIF for publication in IUCrData you should upload your CIF via the web. If your CIF is to form part of a submission to another IUCr journal, you will be asked, either during electronic submission or by the Co-editor handling your paper, to upload your CIF via our web site.

---

**PLATON version of 22/03/2021; check.def file version of 19/03/2021**

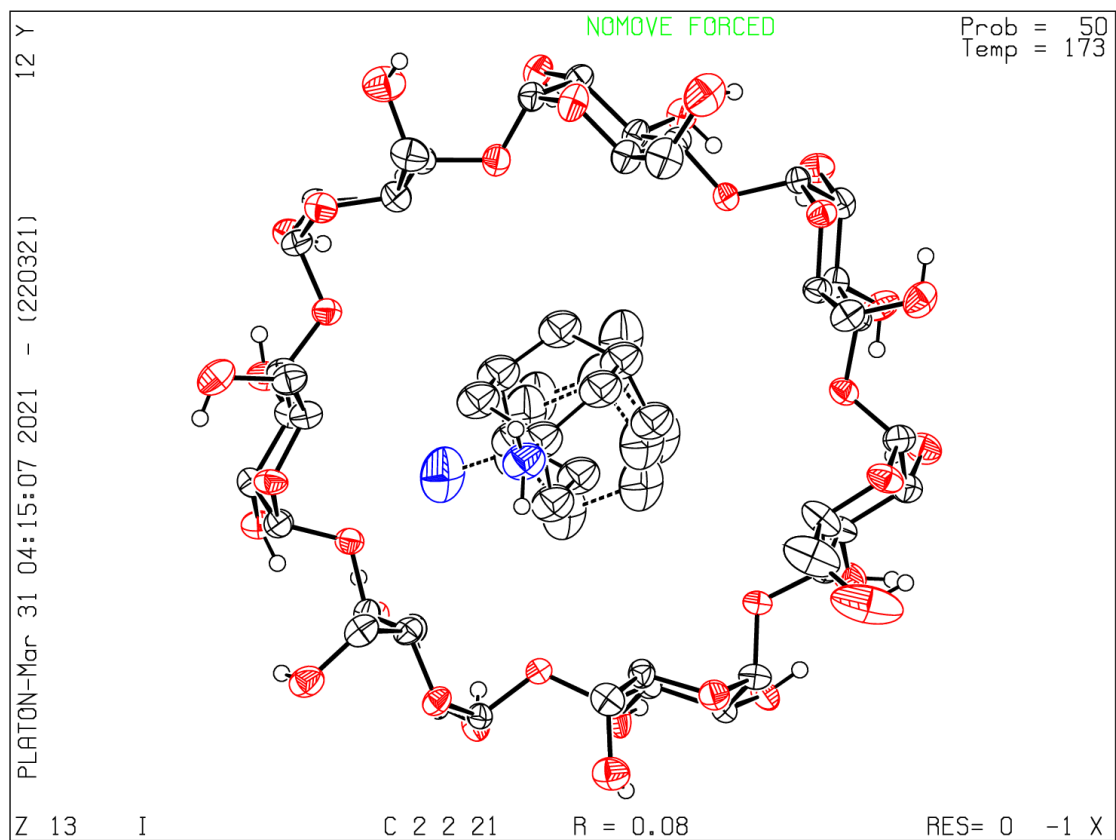

Supplement: s1 [file s1]
