# Supplementary material for: Structural Insights into the Host–Guest Complexation between β-Cyclodextrin and Bio-Conjugatable Adamantane Derivatives
Source: MDPI journal article supplement (doi:10.3390/molecules26092412), 2021-04-21

# checkCIF/PLATON report

You have not supplied any structure factors. As a result the full set of tests cannot be run.

THIS REPORT IS FOR GUIDANCE ONLY. IF USED AS PART OF A REVIEW PROCEDURE FOR PUBLICATION, IT SHOULD NOT REPLACE THE EXPERTISE OF AN EXPERIENCED CRYSTALLOGRAPHIC REFEREE.

No syntax errors found.      CIF dictionary      Interpreting this report

## Datablock: I

---

Bond precision:    C-C = 0.0092 Å                      Wavelength=1.34180

Cell:                      a=23.8095(5)              b=19.2806(4)              c=32.4542(9)  
                                alpha=90                      beta=90                      gamma=90  
Temperature:              173 K

|                        | Calculated                                          | Reported       |
|------------------------|-----------------------------------------------------|----------------|
| Volume                 | 14898.5(6)                                          | 14898.5(6)     |
| Space group            | C 2 2 21                                            | C 2 2 21       |
| Hall group             | C 2c 2                                              | C 2c 2         |
| Moiety formula         | 8(C42 H70 O35), 4(C10 H16 O), C10 H15 O [+ solvent] | ?              |
| Sum formula            | C386 H639 O285 [+ solvent]                          | C386 H639 O285 |
| Mr                     | 9840.01                                             | 9839.93        |
| Dx, g cm <sup>-3</sup> | 1.097                                               | 1.097          |
| Z                      | 1                                                   | 1              |
| Mu (mm <sup>-1</sup> ) | 0.520                                               | 0.520          |
| F000                   | 5235.0                                              | 5235.0         |
| F000'                  | 5250.87                                             |                |
| h,k,lmax               | 29,23,39                                            | 29,23,39       |
| Nref                   | 14191[ 7630]                                        | 14176          |
| Tmin,Tmax              | 0.928,0.959                                         | 0.622,0.751    |
| Tmin'                  | 0.925                                               |                |

Correction method= # Reported T Limits: Tmin=0.622 Tmax=0.751  
AbsCorr = MULTI-SCAN

Data completeness= 1.86/1.00                      Theta(max)= 54.966

R(reflections)= 0.0824( 11540)              wR2(reflections)= 0.2371( 14176)

S = 1.071                                      Npar= 774

---

The following ALERTS were generated. Each ALERT has the format

**test-name\_ALERT\_alert-type\_alert-level.**

Click on the hyperlinks for more details of the test.

---

### Alert level A

PLAT097\_ALERT\_2\_A Large Reported Max. (Positive) Residual Density 1.85 eA-3

---

### Alert level B

PLAT250\_ALERT\_2\_B Large U3/U1 Ratio for Average U(i,j) Tensor .... 6.1 Note  
PLAT416\_ALERT\_2\_B Short Intra D-H..H-D H19 ..H23 . 1.64 Ang.  
x,y,z = 1\_555 Check  
PLAT417\_ALERT\_2\_B Short Inter D-H..H-D H23 ..H29 . 2.07 Ang.  
x,-1-y,-2-z = 3\_543 Check  
PLAT417\_ALERT\_2\_B Short Inter D-H..H-D H24 ..H24 . 2.01 Ang.  
x,-1-y,-2-z = 3\_543 Check  
PLAT420\_ALERT\_2\_B D-H Bond Without Acceptor O6 --H6 . Please Check  
PLAT420\_ALERT\_2\_B D-H Bond Without Acceptor O11 --H11 . Please Check  
PLAT420\_ALERT\_2\_B D-H Bond Without Acceptor O16 --H16 . Please Check  
PLAT420\_ALERT\_2\_B D-H Bond Without Acceptor O21 --H21 . Please Check  
PLAT420\_ALERT\_2\_B D-H Bond Without Acceptor O31 --H31 . Please Check

---

### Alert level C

DIFMX02\_ALERT\_1\_C The maximum difference density is > 0.1\*ZMAX\*0.75  
The relevant atom site should be identified.  
RADNW01\_ALERT\_1\_C The radiation wavelength lies outside the expected range  
for the supplied radiation type. Expected range 1.34130-1.34150  
Wavelength given = 1.34180  
PLAT048\_ALERT\_1\_C MoietyFormula Not Given (or Incomplete) ..... Please Check  
PLAT094\_ALERT\_2\_C Ratio of Maximum / Minimum Residual Density .... 3.81 Report  
PLAT220\_ALERT\_2\_C NonSolvent Resd 1 O Ueq(max)/Ueq(min) Range 3.4 Ratio  
PLAT222\_ALERT\_3\_C NonSolvent Resd 1 H Uiso(max)/Uiso(min) Range 4.5 Ratio  
PLAT234\_ALERT\_4\_C Large Hirshfeld Difference O31 --C37 . 0.17 Ang.  
PLAT250\_ALERT\_2\_C Large U3/U1 Ratio for Average U(i,j) Tensor .... 3.2 Note  
PLAT260\_ALERT\_2\_C Large Average Ueq of Residue Including O37 0.130 Check  
PLAT340\_ALERT\_3\_C Low Bond Precision on C-C Bonds ..... 0.0092 Ang.  
PLAT411\_ALERT\_2\_C Short Inter H...H Contact H25A ..H25A . 2.13 Ang.  
-2-x,y,-5/2-z = 4\_352 Check  
PLAT414\_ALERT\_2\_C Short Intra D-H..H-X H6 ..H9A 1.98 Ang.  
x,y,z = 1\_555 Check  
PLAT415\_ALERT\_2\_C Short Inter D-H..H-X H1A ..H16 . 2.12 Ang.  
-5/2-x,-1/2+y,-5/2-z = 8\_242 Check  
PLAT416\_ALERT\_2\_C Short Intra D-H..H-D H29 ..H33 . 1.97 Ang.  
x,y,z = 1\_555 Check  
PLAT417\_ALERT\_2\_C Short Inter D-H..H-D H4 ..H13 . 2.11 Ang.  
x,-1-y,-2-z = 3\_543 Check  
PLAT417\_ALERT\_2\_C Short Inter D-H..H-D H24 ..H28 . 2.14 Ang.  
x,-1-y,-2-z = 3\_543 Check  
PLAT790\_ALERT\_4\_C Centre of Gravity not Within Unit Cell: Resd. # 1 Note  
C42 H70 O35

---

### Alert level G

ABSMU01\_ALERT\_1\_G Calculation of \_exptl\_absorpt\_correction\_mu  
not performed for this radiation type.  
PLAT002\_ALERT\_2\_G Number of Distance or Angle Restraints on AtSite 22 Note  
PLAT007\_ALERT\_5\_G Number of Unrefined Donor-H Atoms ..... 23 Report  
PLAT032\_ALERT\_4\_G Std. Uncertainty on Flack Parameter Value High . 0.300 Report  
PLAT083\_ALERT\_2\_G SHELXL Second Parameter in WGHT Unusually Large 24.42 Why ?

|                   |                                                  |                |             |
|-------------------|--------------------------------------------------|----------------|-------------|
| PLAT171_ALERT_4_G | The CIF-Embedded .res File Contains EADP Records | 2              | Report      |
| PLAT175_ALERT_4_G | The CIF-Embedded .res File Contains SAME Records | 1              | Report      |
| PLAT300_ALERT_4_G | Atom Site Occupancy of O36                       | Constrained at | 0.5 Check   |
| PLAT300_ALERT_4_G | Atom Site Occupancy of C43                       | Constrained at | 0.5 Check   |
| PLAT300_ALERT_4_G | Atom Site Occupancy of C44                       | Constrained at | 0.5 Check   |
| PLAT300_ALERT_4_G | Atom Site Occupancy of C45                       | Constrained at | 0.5 Check   |
| PLAT300_ALERT_4_G | Atom Site Occupancy of C46                       | Constrained at | 0.5 Check   |
| PLAT300_ALERT_4_G | Atom Site Occupancy of C47                       | Constrained at | 0.5 Check   |
| PLAT300_ALERT_4_G | Atom Site Occupancy of C48                       | Constrained at | 0.5 Check   |
| PLAT300_ALERT_4_G | Atom Site Occupancy of C49                       | Constrained at | 0.5 Check   |
| PLAT300_ALERT_4_G | Atom Site Occupancy of C50                       | Constrained at | 0.5 Check   |
| PLAT300_ALERT_4_G | Atom Site Occupancy of C51                       | Constrained at | 0.5 Check   |
| PLAT300_ALERT_4_G | Atom Site Occupancy of C52                       | Constrained at | 0.5 Check   |
| PLAT300_ALERT_4_G | Atom Site Occupancy of H36                       | Constrained at | 0.5 Check   |
| PLAT300_ALERT_4_G | Atom Site Occupancy of H43A                      | Constrained at | 0.5 Check   |
| PLAT300_ALERT_4_G | Atom Site Occupancy of H44A                      | Constrained at | 0.5 Check   |
| PLAT300_ALERT_4_G | Atom Site Occupancy of H44B                      | Constrained at | 0.5 Check   |
| PLAT300_ALERT_4_G | Atom Site Occupancy of H45A                      | Constrained at | 0.5 Check   |
| PLAT300_ALERT_4_G | Atom Site Occupancy of H45B                      | Constrained at | 0.5 Check   |
| PLAT300_ALERT_4_G | Atom Site Occupancy of H46A                      | Constrained at | 0.5 Check   |
| PLAT300_ALERT_4_G | Atom Site Occupancy of H46B                      | Constrained at | 0.5 Check   |
| PLAT300_ALERT_4_G | Atom Site Occupancy of H47A                      | Constrained at | 0.5 Check   |
| PLAT300_ALERT_4_G | Atom Site Occupancy of H48A                      | Constrained at | 0.5 Check   |
| PLAT300_ALERT_4_G | Atom Site Occupancy of H49A                      | Constrained at | 0.5 Check   |
| PLAT300_ALERT_4_G | Atom Site Occupancy of H49B                      | Constrained at | 0.5 Check   |
| PLAT300_ALERT_4_G | Atom Site Occupancy of H50A                      | Constrained at | 0.5 Check   |
| PLAT300_ALERT_4_G | Atom Site Occupancy of H51A                      | Constrained at | 0.5 Check   |
| PLAT300_ALERT_4_G | Atom Site Occupancy of H51B                      | Constrained at | 0.5 Check   |
| PLAT300_ALERT_4_G | Atom Site Occupancy of H52A                      | Constrained at | 0.5 Check   |
| PLAT300_ALERT_4_G | Atom Site Occupancy of O37                       | Constrained at | 0.125 Check |
| PLAT300_ALERT_4_G | Atom Site Occupancy of C53                       | Constrained at | 0.125 Check |
| PLAT300_ALERT_4_G | Atom Site Occupancy of C54                       | Constrained at | 0.125 Check |
| PLAT300_ALERT_4_G | Atom Site Occupancy of C55                       | Constrained at | 0.125 Check |
| PLAT300_ALERT_4_G | Atom Site Occupancy of C56                       | Constrained at | 0.125 Check |
| PLAT300_ALERT_4_G | Atom Site Occupancy of C57                       | Constrained at | 0.125 Check |
| PLAT300_ALERT_4_G | Atom Site Occupancy of C58                       | Constrained at | 0.125 Check |
| PLAT300_ALERT_4_G | Atom Site Occupancy of C59                       | Constrained at | 0.125 Check |
| PLAT300_ALERT_4_G | Atom Site Occupancy of C60                       | Constrained at | 0.125 Check |
| PLAT300_ALERT_4_G | Atom Site Occupancy of C61                       | Constrained at | 0.125 Check |
| PLAT300_ALERT_4_G | Atom Site Occupancy of C62                       | Constrained at | 0.125 Check |
| PLAT300_ALERT_4_G | Atom Site Occupancy of H37                       | Constrained at | 0.125 Check |
| PLAT300_ALERT_4_G | Atom Site Occupancy of H53A                      | Constrained at | 0.125 Check |
| PLAT300_ALERT_4_G | Atom Site Occupancy of H54A                      | Constrained at | 0.125 Check |
| PLAT300_ALERT_4_G | Atom Site Occupancy of H54B                      | Constrained at | 0.125 Check |
| PLAT300_ALERT_4_G | Atom Site Occupancy of H55A                      | Constrained at | 0.125 Check |
| PLAT300_ALERT_4_G | Atom Site Occupancy of H55B                      | Constrained at | 0.125 Check |
| PLAT300_ALERT_4_G | Atom Site Occupancy of H56A                      | Constrained at | 0.125 Check |
| PLAT300_ALERT_4_G | Atom Site Occupancy of H56B                      | Constrained at | 0.125 Check |
| PLAT300_ALERT_4_G | Atom Site Occupancy of H58A                      | Constrained at | 0.125 Check |
| PLAT300_ALERT_4_G | Atom Site Occupancy of H59A                      | Constrained at | 0.125 Check |
| PLAT300_ALERT_4_G | Atom Site Occupancy of H59B                      | Constrained at | 0.125 Check |
| PLAT300_ALERT_4_G | Atom Site Occupancy of H60A                      | Constrained at | 0.125 Check |
| PLAT300_ALERT_4_G | Atom Site Occupancy of H61A                      | Constrained at | 0.125 Check |
| PLAT300_ALERT_4_G | Atom Site Occupancy of H61B                      | Constrained at | 0.125 Check |
| PLAT300_ALERT_4_G | Atom Site Occupancy of H62A                      | Constrained at | 0.125 Check |
| PLAT302_ALERT_4_G | Anion/Solvent/Minor-Residue Disorder (Resd 2 )   | 100%           | Note        |
| PLAT302_ALERT_4_G | Anion/Solvent/Minor-Residue Disorder (Resd 3 )   | 100%           | Note        |
| PLAT304_ALERT_4_G | Non-Integer Number of Atoms in ..... (Resd 2 )   | 13.50          | Check       |
| PLAT304_ALERT_4_G | Non-Integer Number of Atoms in ..... (Resd 3 )   | 3.25           | Check       |
| PLAT417_ALERT_2_G | Short Inter D-H..H-D H26 ..H36 .                 | 1.25           | Ang.        |
|                   | -2-x,y,-5/2-z =                                  | 4_352          | Check       |
| PLAT606_ALERT_4_G | Solvent Accessible VOID(S) in Structure .....    | !              | Info        |

|                   |                                                  |               |              |                |              |
|-------------------|--------------------------------------------------|---------------|--------------|----------------|--------------|
| PLAT721_ALERT_1_G | Bond                                             | Calc          | 0.85000, Rep | 0.84000 Dev... | 0.01 Ang.    |
|                   | O37                                              | -H37          | 1.555        | 1.555 .....    | # 185 Check  |
| PLAT722_ALERT_1_G | Angle                                            | Calc          | 110.00, Rep  | 111.10 Dev...  | 1.10 Degree  |
|                   | C53                                              | -C54 -H54A    | 1.555        | 1.555 1.555    | # 357 Check  |
| PLAT722_ALERT_1_G | Angle                                            | Calc          | 108.00, Rep  | 109.10 Dev...  | 1.10 Degree  |
|                   | C54                                              | -C60 -H60A    | 1.555        | 1.555 1.555    | # 394 Check  |
| PLAT789_ALERT_4_G | Atoms with Negative _atom_site_disorder_group    |               |              |                | # 26 Check   |
| PLAT790_ALERT_4_G | Centre of Gravity not Within Unit Cell: Resd.    |               |              |                | # 2 Note     |
|                   | C10                                              | H16 O         |              |                |              |
| PLAT790_ALERT_4_G | Centre of Gravity not Within Unit Cell: Resd.    |               |              |                | # 3 Note     |
|                   | C10                                              | H15 O         |              |                |              |
| PLAT791_ALERT_4_G | Model has Chirality at C2                        | (Sohnke SpGr) |              |                | R Verify     |
| PLAT791_ALERT_4_G | Model has Chirality at C3                        | (Sohnke SpGr) |              |                | S Verify     |
| PLAT791_ALERT_4_G | Model has Chirality at C4                        | (Sohnke SpGr) |              |                | R Verify     |
| PLAT791_ALERT_4_G | Model has Chirality at C5                        | (Sohnke SpGr) |              |                | R Verify     |
| PLAT791_ALERT_4_G | Model has Chirality at C6                        | (Sohnke SpGr) |              |                | R Verify     |
| PLAT791_ALERT_4_G | Model has Chirality at C8                        | (Sohnke SpGr) |              |                | R Verify     |
| PLAT791_ALERT_4_G | Model has Chirality at C9                        | (Sohnke SpGr) |              |                | S Verify     |
| PLAT791_ALERT_4_G | Model has Chirality at C10                       | (Sohnke SpGr) |              |                | R Verify     |
| PLAT791_ALERT_4_G | Model has Chirality at C11                       | (Sohnke SpGr) |              |                | R Verify     |
| PLAT791_ALERT_4_G | Model has Chirality at C12                       | (Sohnke SpGr) |              |                | R Verify     |
| PLAT791_ALERT_4_G | Model has Chirality at C14                       | (Sohnke SpGr) |              |                | R Verify     |
| PLAT791_ALERT_4_G | Model has Chirality at C15                       | (Sohnke SpGr) |              |                | S Verify     |
| PLAT791_ALERT_4_G | Model has Chirality at C16                       | (Sohnke SpGr) |              |                | R Verify     |
| PLAT791_ALERT_4_G | Model has Chirality at C17                       | (Sohnke SpGr) |              |                | R Verify     |
| PLAT791_ALERT_4_G | Model has Chirality at C18                       | (Sohnke SpGr) |              |                | R Verify     |
| PLAT791_ALERT_4_G | Model has Chirality at C20                       | (Sohnke SpGr) |              |                | R Verify     |
| PLAT791_ALERT_4_G | Model has Chirality at C21                       | (Sohnke SpGr) |              |                | S Verify     |
| PLAT791_ALERT_4_G | Model has Chirality at C22                       | (Sohnke SpGr) |              |                | R Verify     |
| PLAT791_ALERT_4_G | Model has Chirality at C23                       | (Sohnke SpGr) |              |                | R Verify     |
| PLAT791_ALERT_4_G | Model has Chirality at C24                       | (Sohnke SpGr) |              |                | R Verify     |
| PLAT791_ALERT_4_G | Model has Chirality at C26                       | (Sohnke SpGr) |              |                | R Verify     |
| PLAT791_ALERT_4_G | Model has Chirality at C27                       | (Sohnke SpGr) |              |                | S Verify     |
| PLAT791_ALERT_4_G | Model has Chirality at C28                       | (Sohnke SpGr) |              |                | R Verify     |
| PLAT791_ALERT_4_G | Model has Chirality at C29                       | (Sohnke SpGr) |              |                | R Verify     |
| PLAT791_ALERT_4_G | Model has Chirality at C30                       | (Sohnke SpGr) |              |                | R Verify     |
| PLAT791_ALERT_4_G | Model has Chirality at C32                       | (Sohnke SpGr) |              |                | R Verify     |
| PLAT791_ALERT_4_G | Model has Chirality at C33                       | (Sohnke SpGr) |              |                | S Verify     |
| PLAT791_ALERT_4_G | Model has Chirality at C34                       | (Sohnke SpGr) |              |                | R Verify     |
| PLAT791_ALERT_4_G | Model has Chirality at C35                       | (Sohnke SpGr) |              |                | R Verify     |
| PLAT791_ALERT_4_G | Model has Chirality at C36                       | (Sohnke SpGr) |              |                | R Verify     |
| PLAT791_ALERT_4_G | Model has Chirality at C38                       | (Sohnke SpGr) |              |                | R Verify     |
| PLAT791_ALERT_4_G | Model has Chirality at C39                       | (Sohnke SpGr) |              |                | S Verify     |
| PLAT791_ALERT_4_G | Model has Chirality at C40                       | (Sohnke SpGr) |              |                | R Verify     |
| PLAT791_ALERT_4_G | Model has Chirality at C41                       | (Sohnke SpGr) |              |                | R Verify     |
| PLAT791_ALERT_4_G | Model has Chirality at C42                       | (Sohnke SpGr) |              |                | R Verify     |
| PLAT860_ALERT_3_G | Number of Least-Squares Restraints .....         |               |              |                | 33 Note      |
| PLAT869_ALERT_4_G | ALERTS Related to the Use of SQUEEZE Suppressed  |               |              |                | ! Info       |
| PLAT883_ALERT_1_G | No Info/Value for _atom_sites_solution_primary . |               |              |                | Please Do !  |
| PLAT965_ALERT_2_G | The SHELXL WEIGHT Optimisation has not Converged |               |              |                | Please Check |

- 
- 1 **ALERT level A** = Most likely a serious problem - resolve or explain  
 9 **ALERT level B** = A potentially serious problem, consider carefully  
 17 **ALERT level C** = Check. Ensure it is not caused by an omission or oversight  
 111 **ALERT level G** = General information/check it is not something unexpected
- 8 ALERT type 1 CIF construction/syntax error, inconsistent or missing data  
 24 ALERT type 2 Indicator that the structure model may be wrong or deficient  
 3 ALERT type 3 Indicator that the structure quality may be low  
 102 ALERT type 4 Improvement, methodology, query or suggestion  
 1 ALERT type 5 Informative message, check

---

## checkCIF publication errors

---

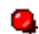

### Alert level A

PUBL004\_ALERT\_1\_A The contact author's name and address are missing,  
\_publ\_contact\_author\_name and \_publ\_contact\_author\_address.  
PUBL005\_ALERT\_1\_A \_publ\_contact\_author\_email, \_publ\_contact\_author\_fax and  
\_publ\_contact\_author\_phone are all missing.  
At least one of these should be present.  
PUBL006\_ALERT\_1\_A \_publ\_requested\_journal is missing  
e.g. 'Acta Crystallographica Section C'  
PUBL008\_ALERT\_1\_A \_publ\_section\_title is missing. Title of paper.  
PUBL009\_ALERT\_1\_A \_publ\_author\_name is missing. List of author(s) name(s).  
PUBL010\_ALERT\_1\_A \_publ\_author\_address is missing. Author(s) address(es).  
PUBL012\_ALERT\_1\_A \_publ\_section\_abstract is missing.  
Abstract of paper in English.

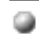

### Alert level G

PUBL017\_ALERT\_1\_G The \_publ\_section\_references section is missing or  
empty.

---

7 **ALERT level A** = Data missing that is essential or data in wrong format  
1 **ALERT level G** = General alerts. Data that may be required is missing

---

## Publication of your CIF

You should attempt to resolve as many as possible of the alerts in all categories. Often the minor alerts point to easily fixed oversights, errors and omissions in your CIF or refinement strategy, so attention to these fine details can be worthwhile. In order to resolve some of the more serious problems it may be necessary to carry out additional measurements or structure refinements. However, the nature of your study may justify the reported deviations from journal submission requirements and the more serious of these should be commented upon in the discussion or experimental section of a paper or in the "special\_details" fields of the CIF. *checkCIF* was carefully designed to identify outliers and unusual parameters, but every test has its limitations and alerts that are not important in a particular case may appear. Conversely, the absence of alerts does not guarantee there are no aspects of the results needing attention. It is up to the individual to critically assess their own results and, if necessary, seek expert advice.

If level A alerts remain, which you believe to be justified deviations, and you intend to submit this CIF for publication in a journal, you should additionally insert an explanation in your CIF using the Validation Reply Form (VRF) below. This will allow your explanation to be considered as part of the review process.

## Validation response form

Please find below a validation response form (VRF) that can be filled in and pasted into your CIF.

```

# start Validation Reply Form
_vrf_PUBL004_GLOBAL
;
PROBLEM: The contact author's name and address are missing,
RESPONSE: ...
;
_vrf_PUBL005_GLOBAL
;
PROBLEM: _publ_contact_author_email, _publ_contact_author_fax and
RESPONSE: ...
;
_vrf_PUBL006_GLOBAL
;
PROBLEM: _publ_requested_journal is missing
RESPONSE: ...
;
_vrf_PUBL008_GLOBAL
;
PROBLEM: _publ_section_title is missing. Title of paper.
RESPONSE: ...
;
_vrf_PUBL009_GLOBAL
;
PROBLEM: _publ_author_name is missing. List of author(s) name(s).
RESPONSE: ...
;
_vrf_PUBL010_GLOBAL
;
PROBLEM: _publ_author_address is missing. Author(s) address(es).
RESPONSE: ...
;
_vrf_PUBL012_GLOBAL
;
PROBLEM: _publ_section_abstract is missing.
RESPONSE: ...
;
_vrf_PLAT097_I
;
PROBLEM: Large Reported Max. (Positive) Residual Density      1.85 eA-3
RESPONSE: ...
;
# end Validation Reply Form

```

If you wish to submit your CIF for publication in Acta Crystallographica Section C or E, you should upload your CIF via the web. If you wish to submit your CIF for publication in IUCrData you should upload your CIF via the web. If your CIF is to form part of a submission to another IUCr journal, you will be asked, either during electronic submission or by the Co-editor handling your paper, to upload your CIF via our web site.

---

**PLATON version of 22/03/2021; check.def file version of 19/03/2021**

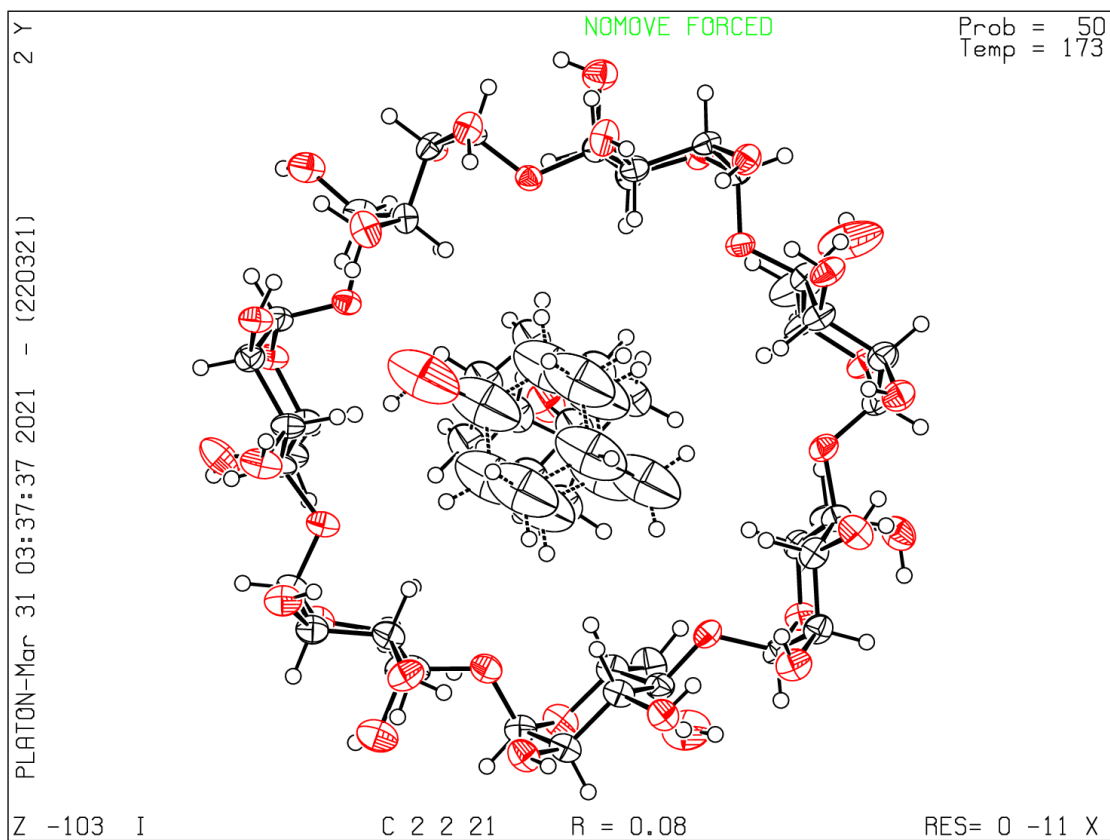

Supplement: s1 [file s1]
