# Supplementary material for: Structural Insights into the Host–Guest Complexation between β-Cyclodextrin and Bio-Conjugatable Adamantane Derivatives
Source: MDPI journal article supplement (doi:10.3390/molecules26092412), 2021-04-21
Supplement: s1 [file s1]

## Structural Insights into the Host-Guest Complexation between $\beta$ -Cyclodextrin and Bio-conjugatable Adamantane Derivatives

### Table of Contents

|                                                                                                                                                                                                                                                     |    |
|-----------------------------------------------------------------------------------------------------------------------------------------------------------------------------------------------------------------------------------------------------|----|
| Figure S1. The $^1\text{H}$ NMR spectrum (500 MHz, $\text{DMSO-}d_6$ , room temperature) of 1. ....                                                                                                                                                 | 3  |
| Figure S2. The $^1\text{H}$ NMR spectrum (500 MHz, $\text{DMSO-}d_6$ , room temperature) of 2. ....                                                                                                                                                 | 3  |
| Figure S3. The $^1\text{H}$ NMR spectrum (500 MHz, $\text{DMSO-}d_6$ , room temperature) of 3. ....                                                                                                                                                 | 4  |
| Figure S4. The $^1\text{H}$ NMR spectrum (500 MHz, $\text{DMSO-}d_6$ , room temperature) of 4. ....                                                                                                                                                 | 4  |
| Figure S5. The $^1\text{H}$ NMR spectrum (500 MHz, $\text{DMSO-}d_6$ , room temperature) of 5. ....                                                                                                                                                 | 5  |
| Figure S6. The $^1\text{H}$ NMR spectrum (500 MHz, $\text{DMSO-}d_6$ , room temperature) of 6. ....                                                                                                                                                 | 5  |
| Figure S7. The $^1\text{H}$ NMR spectra (500 MHz, $\text{DMSO-}d_6$ , room temperature) of 1, $\beta$ -CD and adm-1-OH. ....                                                                                                                        | 6  |
| Figure S8. The $^1\text{H}$ NMR spectra (500 MHz, $\text{DMSO-}d_6$ , room temperature) of 2, $\beta$ -CD and adm-2-OH. ....                                                                                                                        | 6  |
| Figure S9. The $^1\text{H}$ NMR spectra (500 MHz, $\text{DMSO-}d_6$ , room temperature) of 3, $\beta$ -CD and adm-1-NH <sub>2</sub> . ....                                                                                                          | 7  |
| Figure S10. The $^1\text{H}$ NMR spectra (500 MHz, $\text{DMSO-}d_6$ , room temperature) of 4, $\beta$ -CD and adm-1-COOH. ....                                                                                                                     | 7  |
| Figure S11. The $^1\text{H}$ NMR spectra (500 MHz, $\text{DMSO-}d_6$ , room temperature) of 5, $\beta$ -CD and adm-1,3-diCOOH. ....                                                                                                                 | 8  |
| Figure S12. The $^1\text{H}$ NMR spectra (500 MHz, $\text{DMSO-}d_6$ , room temperature) of 6, $\beta$ -CD and adm-1,3-diCH <sub>2</sub> COOH. ....                                                                                                 | 8  |
| Figure S13. (a) 2D NOESY spectra (500 MHz, $\text{DMSO-}d_6$ , room temperature) of 1 with (b) expansion of significant regions showing interactions between adm-1-OH and $\beta$ -CD. ....                                                         | 9  |
| Figure S14. (a) 2D NOESY spectra (500 MHz, $\text{DMSO-}d_6$ , room temperature) of 2 with (b) expansion of significant regions showing interactions between adm-2-OH and $\beta$ -CD. ....                                                         | 9  |
| Figure S15. (a) 2D NOESY spectra (500 MHz, $\text{DMSO-}d_6$ , room temperature) of 3 with (b) expansion of significant regions showing interactions between adm-1-NH <sub>2</sub> and $\beta$ -CD. ....                                            | 9  |
| Figure S16. (a) 2D NOESY spectra (500 MHz, $\text{DMSO-}d_6$ , room temperature) of 4 with (b) expansion of significant regions showing interactions between adm-1-NH <sub>2</sub> and $\beta$ -CD. ....                                            | 10 |
| Figure S17. (a) 2D NOESY spectra (500 MHz, $\text{DMSO-}d_6$ , room temperature) of 5 with (b) expansion of significant regions showing interactions between adm-1,3-diCOOH and $\beta$ -CD. ....                                                   | 10 |
| Figure S18. (a) 2D NOESY spectra (500 MHz, $\text{DMSO-}d_6$ , room temperature) of 6 with (b) expansion of significant regions showing interactions between adm-1,3-diCH <sub>2</sub> COOH and $\beta$ -CD. ....                                   | 10 |
| Figure S19. (a) TG traces of adm-2-OH, $\beta$ -CD and 2. (b) A comparison of the DSC-TGA curves of 2 and its subcomponents $\beta$ -CD and adm-2-OH, showing the melting point alteration upon complex formation. ....                             | 11 |
| Figure S20. (a) TG traces of adm-1-NH <sub>2</sub> , $\beta$ -CD and 3. (b) A comparison of the DSC-TGA curves of 3 and its subcomponents $\beta$ -CD and adm-1-NH <sub>2</sub> , showing the melting point alteration upon complex formation. .... | 11 |

|                                                                                                                                                                                                                                                                     |    |
|---------------------------------------------------------------------------------------------------------------------------------------------------------------------------------------------------------------------------------------------------------------------|----|
| Figure S21. (a) TG traces of adm-1-COOH, $\beta$ -CD and 4. (b) A comparison of the DSC-TGA curves of 4 and its subcomponents $\beta$ -CD and adm-1-COOH, showing the melting point alteration upon complex formation. ....                                         | 11 |
| Figure S22. (a) TG traces of adm-1,3-diCOOH, $\beta$ -CD and 5. (b) A comparison of the DSC-TGA curves of 5 and its subcomponents $\beta$ -CD and adm-1,3-diCOOH, showing the melting point alteration upon complex formation. ....                                 | 12 |
| Figure S23. (a) TG traces of adm-1,3-diCH <sub>2</sub> COOH, $\beta$ -CD and 6. (b) A comparison of the DSC-TGA curves of 6 its subcomponents $\beta$ -CD and adm-1,3-diCH <sub>2</sub> COOH, showing the melting point alteration upon complex formation. ....     | 12 |
| Figure S24. The X-ray crystal structure of 3 showing the diverse guest orientations in the inclusion complexes. The guests are presented as a space-filling model. The hydrogen atoms are omitted for clarity. Color codes: O (brown-red), N (blue), C (black). ... | 13 |
| Figure S25. The crystal packing diagram of 6 (along <i>c</i> direction). Color codes: O (red) and C (gray). ....                                                                                                                                                    | 13 |
| Table S1. Chemical shifts of adamantane derivative 1 with/without complexation with $\beta$ -CD (recorded in DMSO- <i>d</i> <sub>6</sub> with TMS as the internal standard) for comparison. ....                                                                    | 14 |
| Table S2. Chemical shifts of adamantane derivative 2 with/without complexation with $\beta$ -CD (recorded in DMSO- <i>d</i> <sub>6</sub> with TMS as the internal standard) for comparison. ....                                                                    | 14 |
| Table S3. Chemical shifts of adamantane derivative 3 with/without complexation with $\beta$ -CD (recorded in DMSO- <i>d</i> <sub>6</sub> with TMS as the internal standard) for comparison. ....                                                                    | 14 |
| Table S4. Chemical shifts of adamantane derivative 4 with/without complexation with $\beta$ -CD (recorded in DMSO- <i>d</i> <sub>6</sub> with TMS as the internal standard) for comparison. ....                                                                    | 14 |
| Table S5. Chemical shifts of adamantane derivative 5 with/without complexation with $\beta$ -CD (recorded in DMSO- <i>d</i> <sub>6</sub> with TMS as the internal standard) for comparison. ....                                                                    | 14 |
| Table S6. Chemical shifts of adamantane derivative 6 with/without complexation with $\beta$ -CD (recorded in DMSO- <i>d</i> <sub>6</sub> with TMS as the internal standard) for comparison. ....                                                                    | 15 |
| Table S7. Chemical shifts of $\beta$ -CD in 1 with/without complexation with adamantane derivative (recorded in DMSO- <i>d</i> <sub>6</sub> with TMS as the internal standard) for comparison. ....                                                                 | 15 |
| Table S8. Chemical shifts of $\beta$ -CD in 2 with/without complexation with adamantane derivative (recorded in DMSO- <i>d</i> <sub>6</sub> with TMS as the internal standard) for comparison. ....                                                                 | 15 |
| Table S9. Chemical shifts of $\beta$ -CD in 3 with/without complexation with adamantane derivative (recorded in DMSO- <i>d</i> <sub>6</sub> with TMS as the internal standard) for comparison. ....                                                                 | 16 |
| Table S10. Chemical shifts of $\beta$ -CD in 4 with/without complexation with adamantane derivative (recorded in DMSO- <i>d</i> <sub>6</sub> with TMS as the internal standard) for comparison. ....                                                                | 16 |
| Table S11. Chemical shifts of $\beta$ -CD in 5 with/without complexation with adamantane derivative (recorded in DMSO- <i>d</i> <sub>6</sub> with TMS as the internal standard) for comparison. ....                                                                | 16 |
| Table S12. Chemical shifts of $\beta$ -CD in 6 with/without complexation with adamantane derivative (recorded in DMSO- <i>d</i> <sub>6</sub> with TMS as the internal standard) for comparison. ....                                                                | 17 |

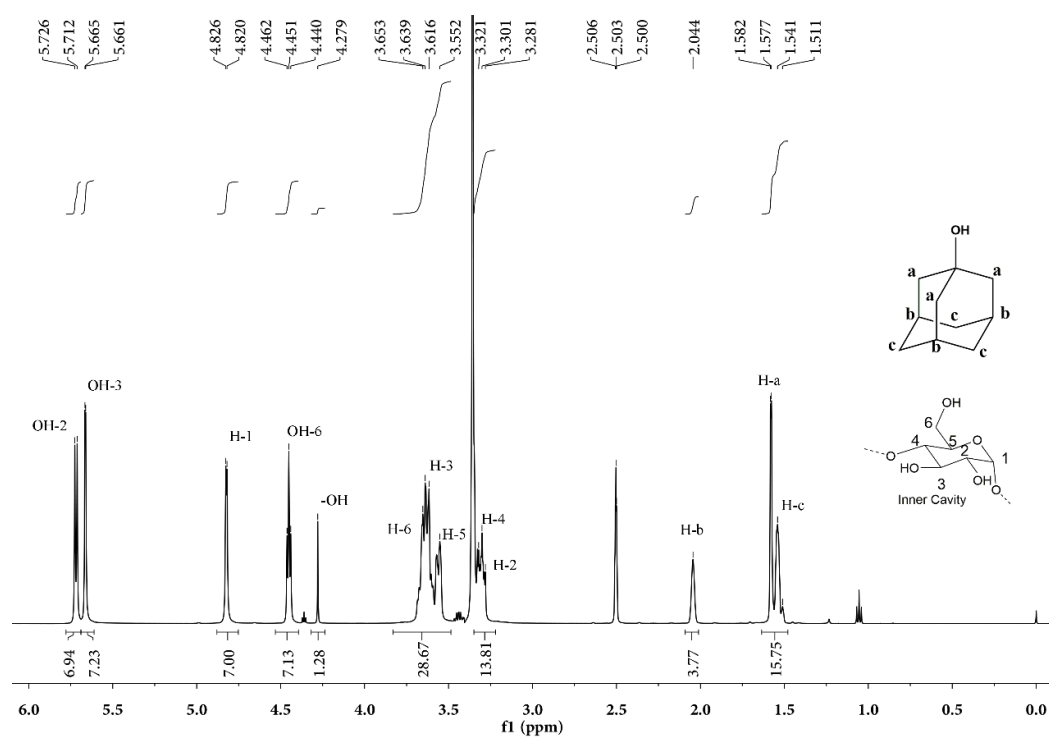

**Figure S1.** The  $^1\text{H}$  NMR spectrum (500 MHz,  $\text{DMSO}-d_6$ , room temperature) of **1**.

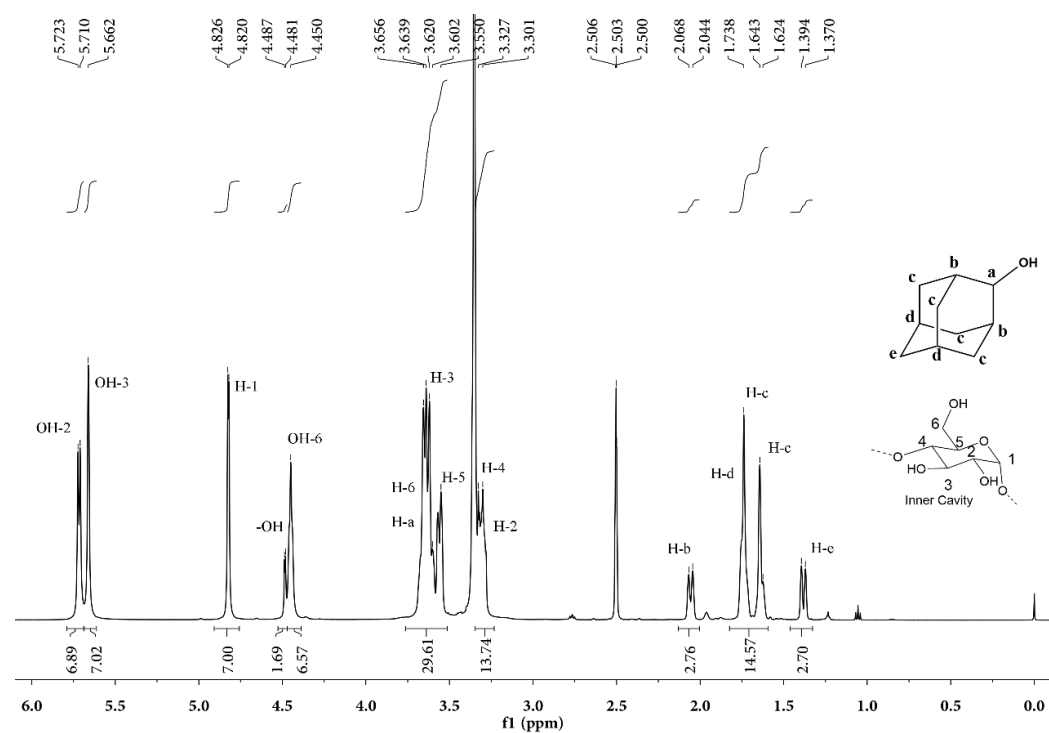

**Figure S2.** The  $^1\text{H}$  NMR spectrum (500 MHz,  $\text{DMSO}-d_6$ , room temperature) of **2**.

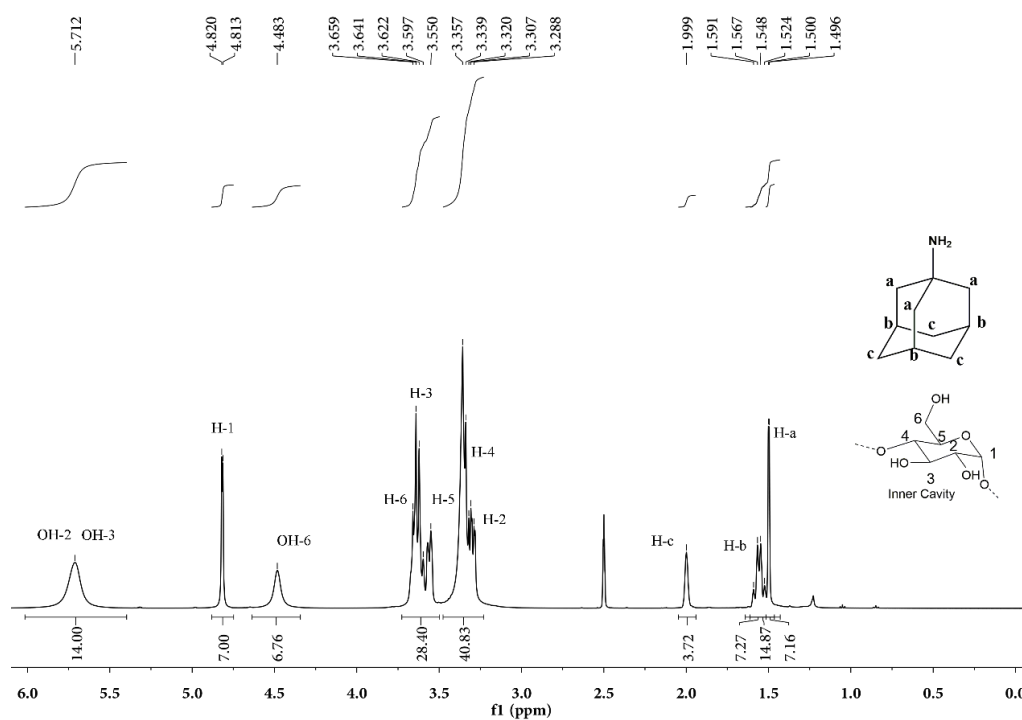

**Figure S3.** The <sup>1</sup>H NMR spectrum (500 MHz, DMSO-*d*<sub>6</sub>, room temperature) of **3**.

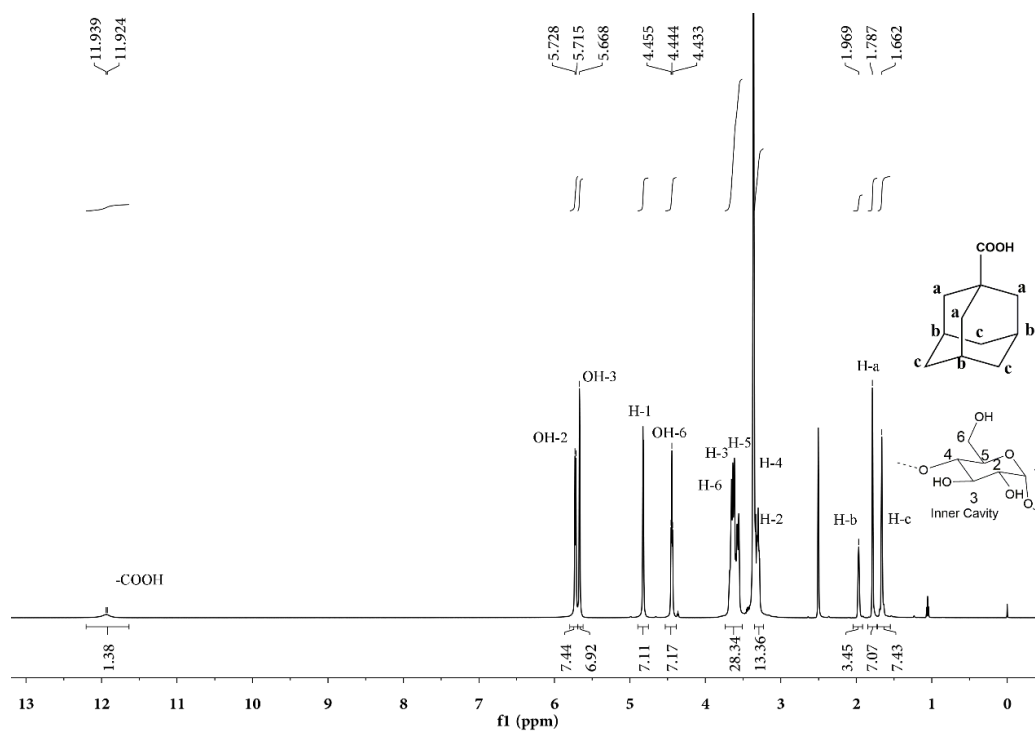

**Figure S4.** The <sup>1</sup>H NMR spectrum (500 MHz, DMSO-*d*<sub>6</sub>, room temperature) of **4**.

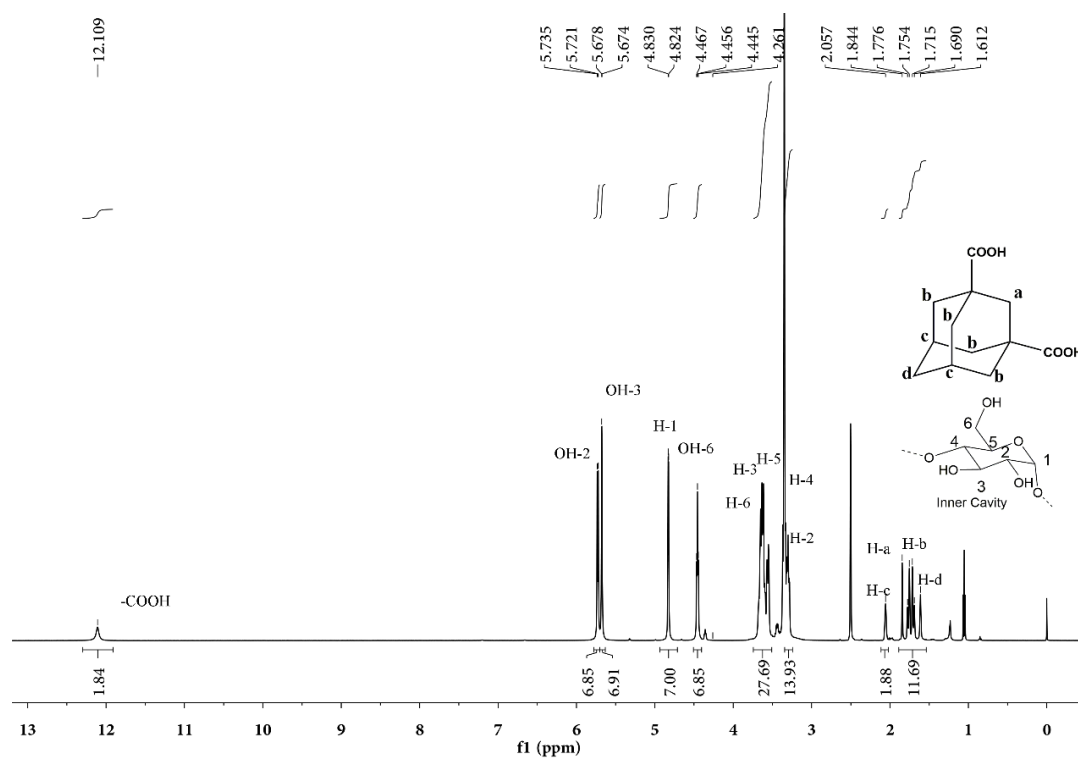

**Figure S5.** The  $^1\text{H}$  NMR spectrum (500 MHz,  $\text{DMSO}-d_6$ , room temperature) of **5**.

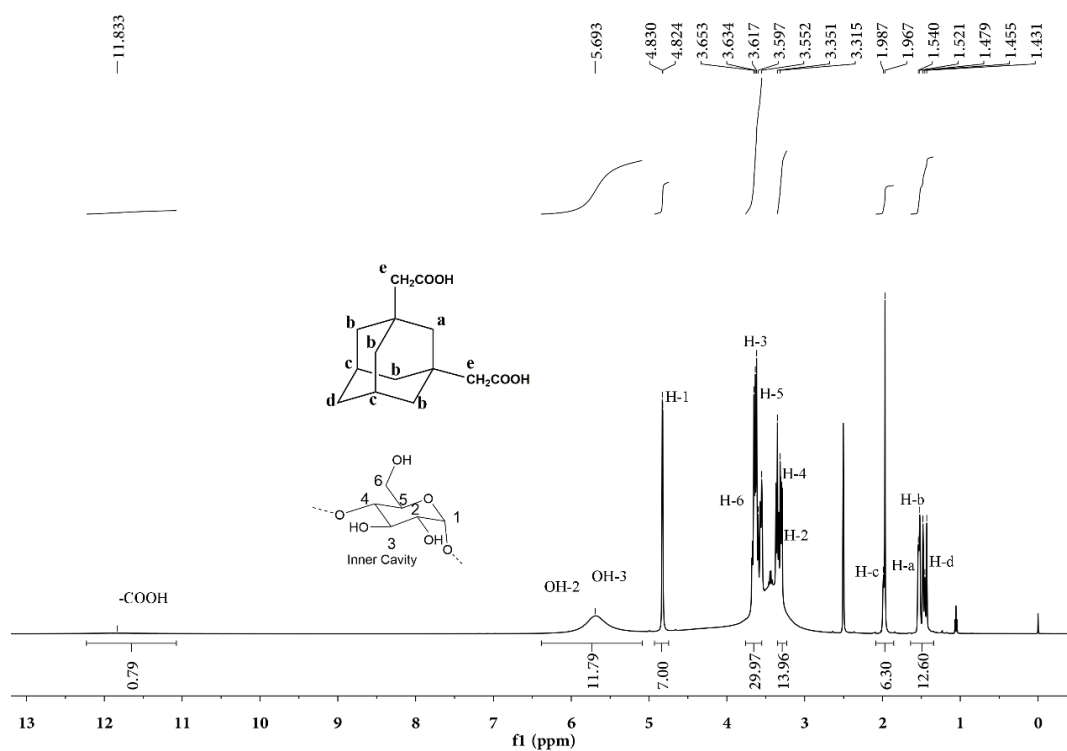

**Figure S6.** The  $^1\text{H}$  NMR spectrum (500 MHz,  $\text{DMSO}-d_6$ , room temperature) of **6**.

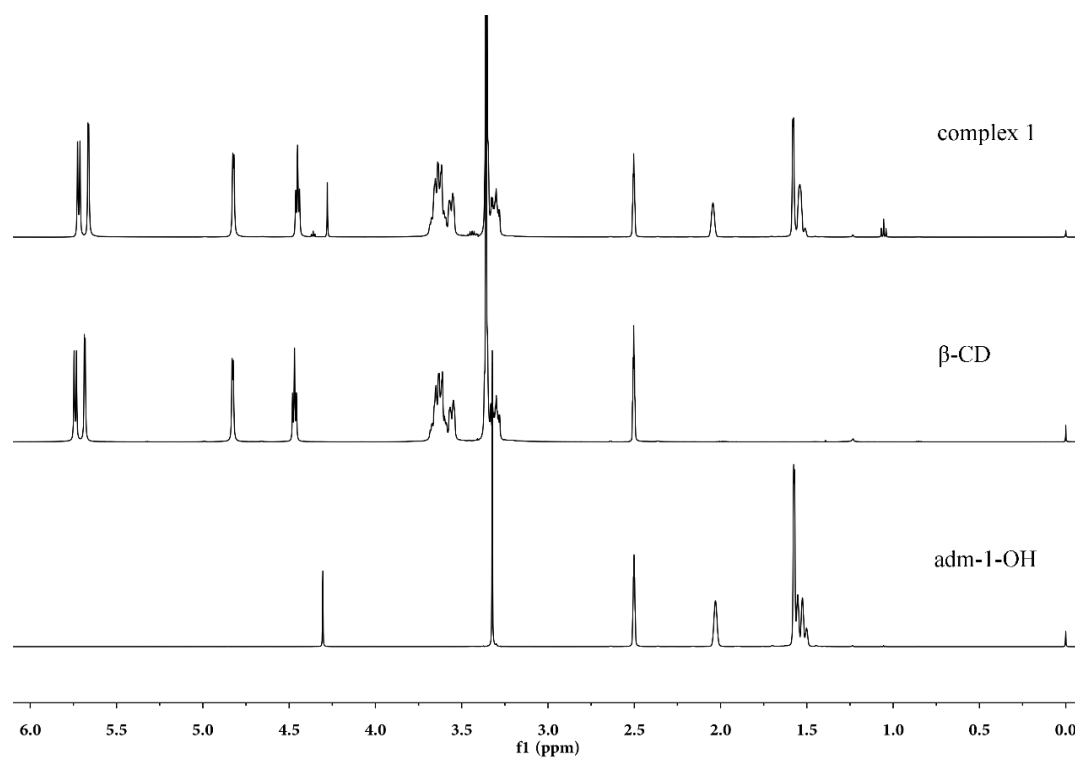

**Figure S7.** The  $^1\text{H}$  NMR spectra (500 MHz,  $\text{DMSO}-d_6$ , room temperature) of **1**,  $\beta\text{-CD}$  and adm-1-OH.

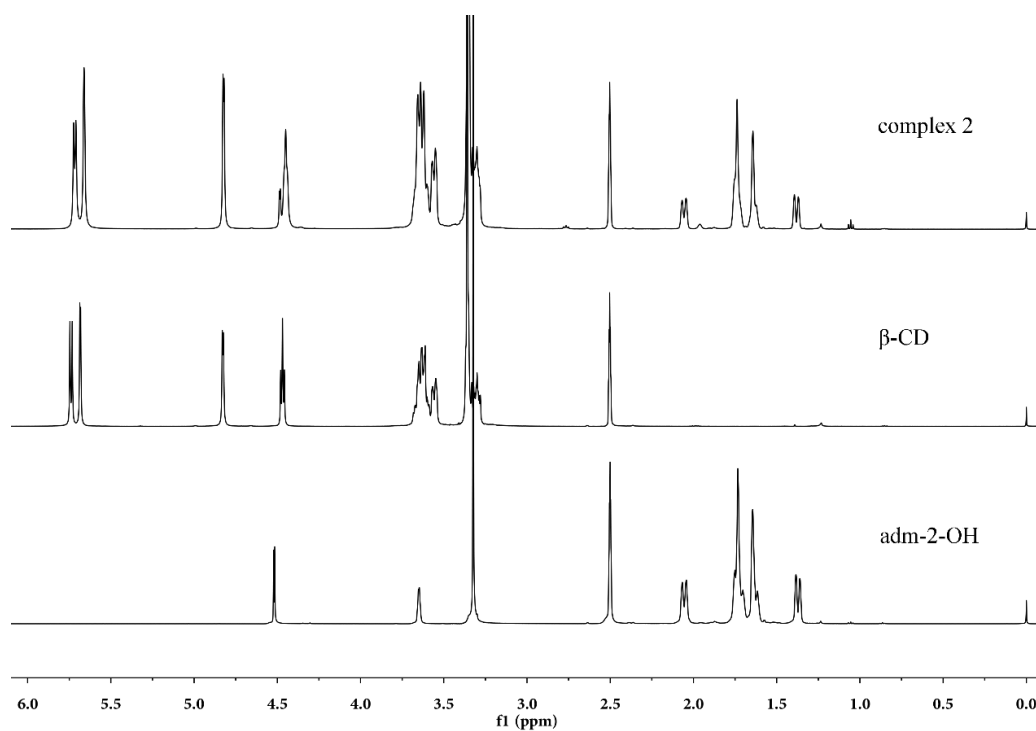

**Figure S8.** The  $^1\text{H}$  NMR spectra (500 MHz,  $\text{DMSO}-d_6$ , room temperature) of **2**,  $\beta\text{-CD}$  and adm-2-OH.

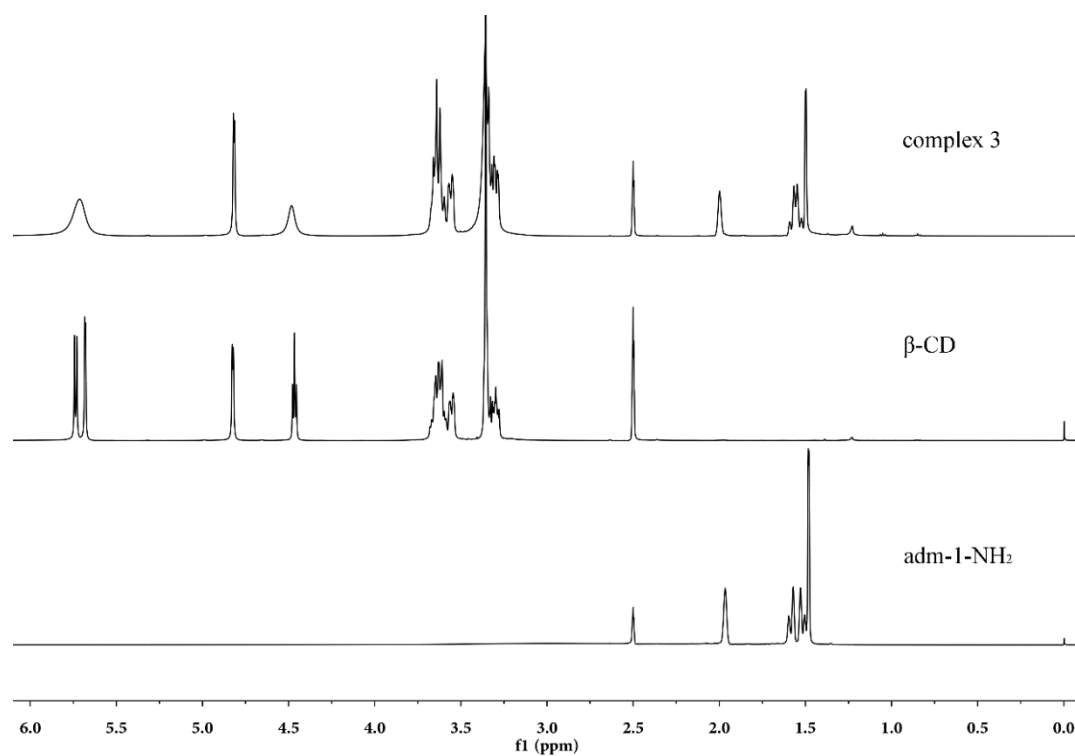

**Figure S9.** The  $^1\text{H}$  NMR spectra (500 MHz,  $\text{DMSO}-d_6$ , room temperature) of **3**,  $\beta\text{-CD}$  and  $\text{adm-1-NH}_2$ .

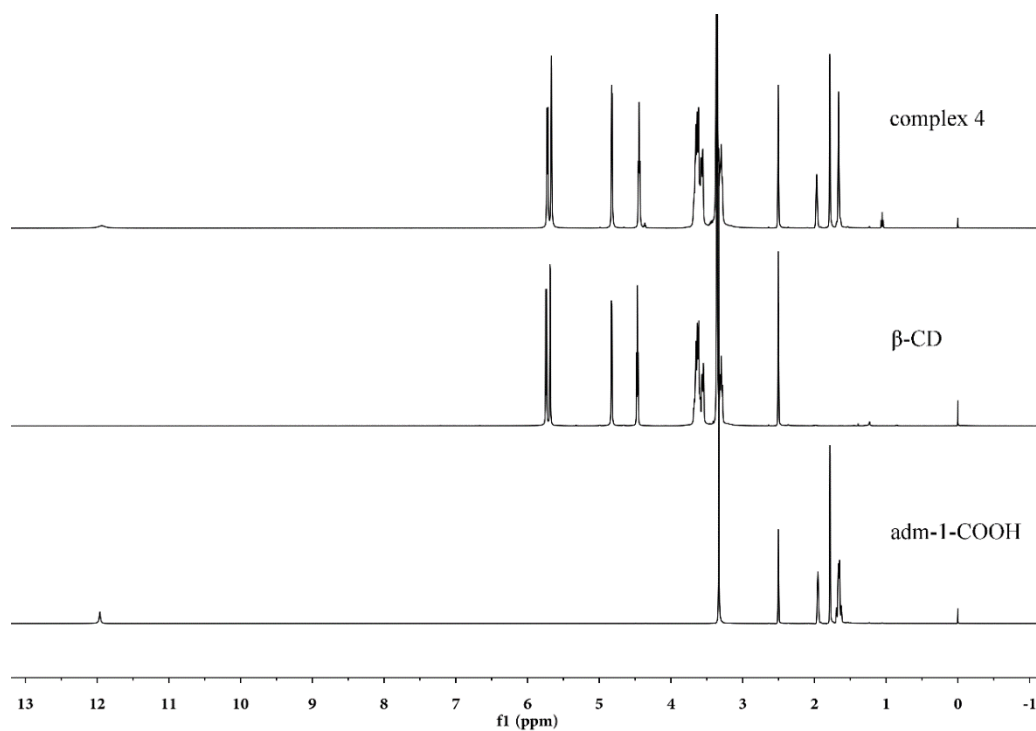

**Figure S10.** The  $^1\text{H}$  NMR spectra (500 MHz,  $\text{DMSO}-d_6$ , room temperature) of **4**,  $\beta\text{-CD}$  and  $\text{adm-1-COOH}$ .

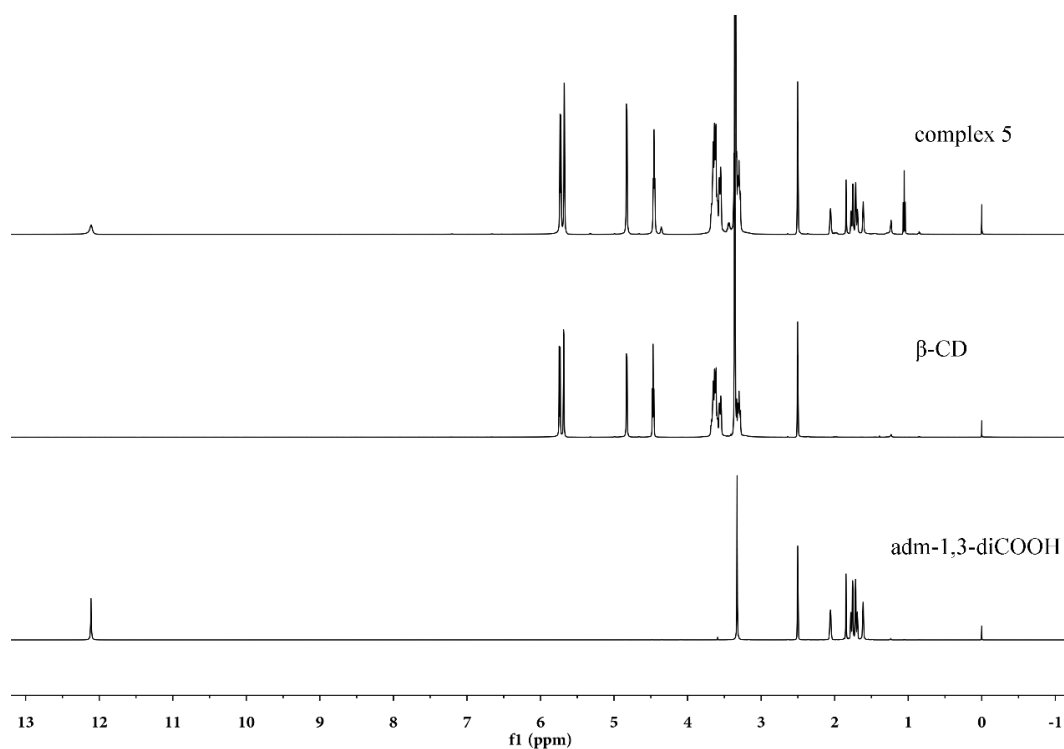

**Figure S11.** The  $^1\text{H}$  NMR spectra (500 MHz,  $\text{DMSO}-d_6$ , room temperature) of 5,  $\beta\text{-CD}$  and adm-1,3-diCOOH.

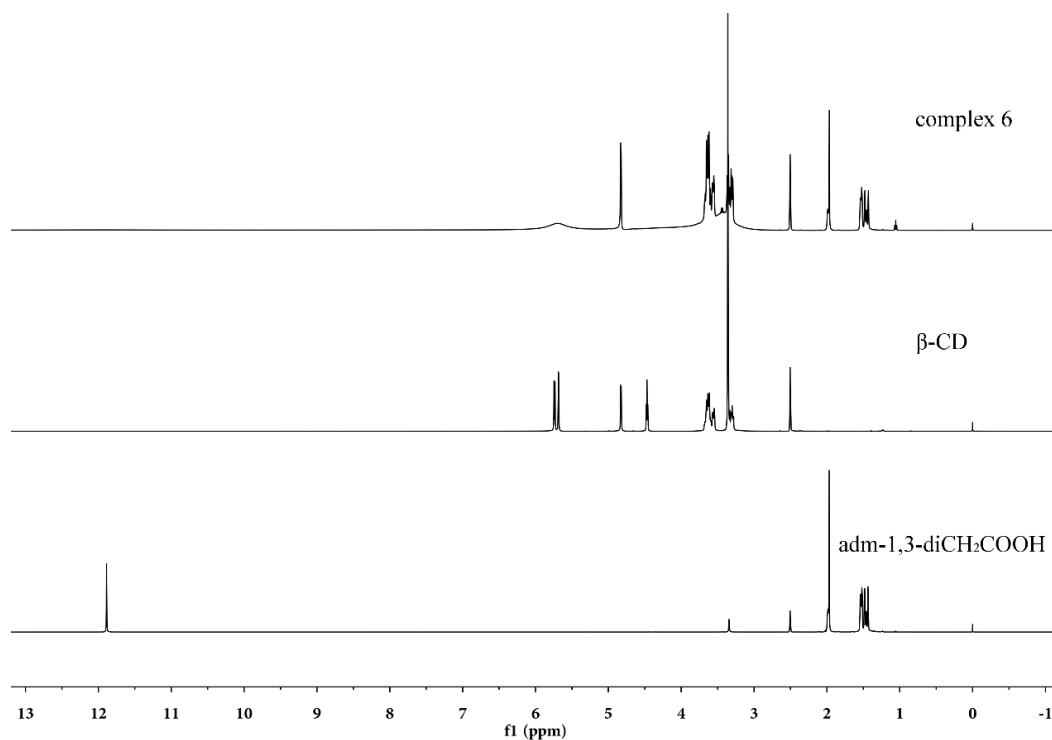

**Figure S12.** The  $^1\text{H}$  NMR spectra (500 MHz,  $\text{DMSO}-d_6$ , room temperature) of 6,  $\beta\text{-CD}$  and adm-1,3-diCH<sub>2</sub>COOH.



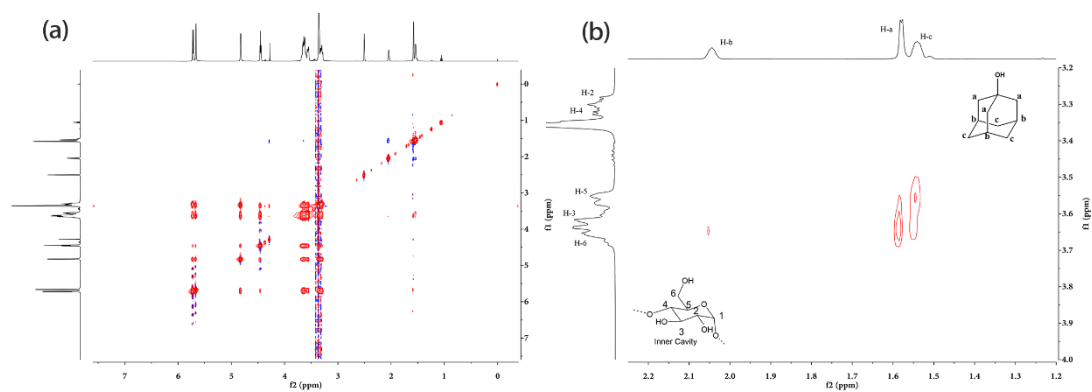

**Figure S13.** (a) 2D NOESY spectra (500 MHz, DMSO- $d_6$ , room temperature) of **1** with (b) expansion of significant regions showing interactions between adm-1-OH and  $\beta$ -CD.

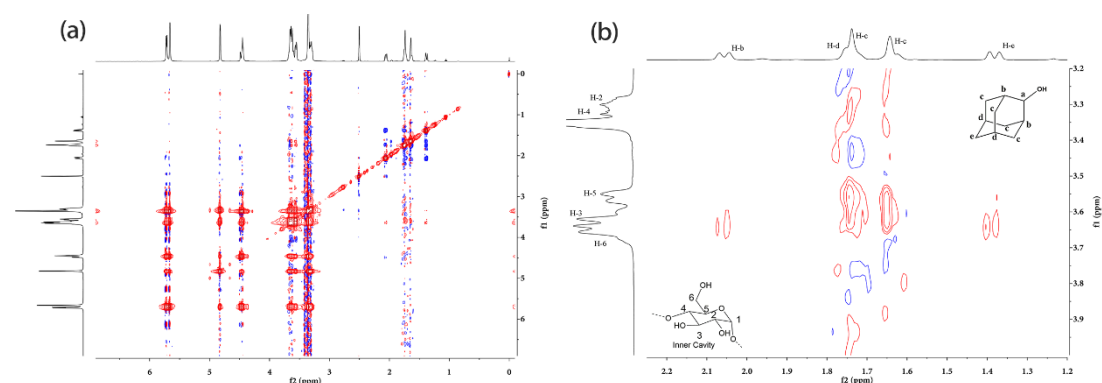

**Figure S14.** (a) 2D NOESY spectra (500 MHz, DMSO- $d_6$ , room temperature) of **2** with (b) expansion of significant regions showing interactions between adm-2-OH and  $\beta$ -CD.

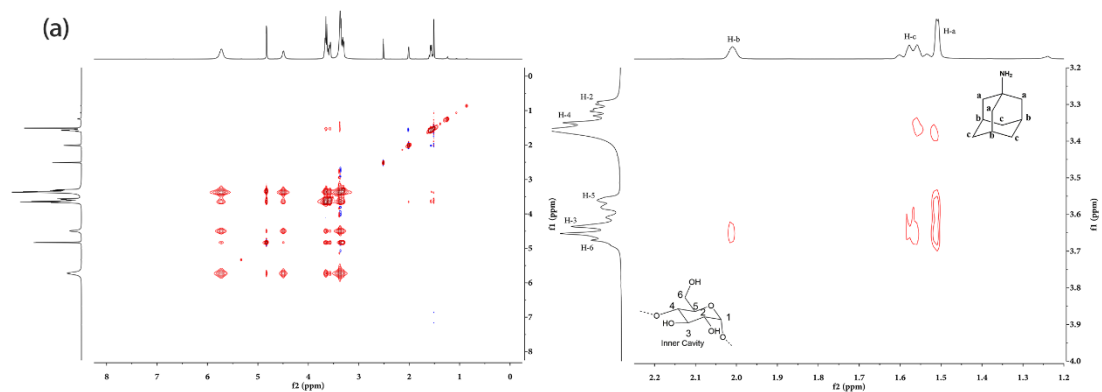

**Figure S15.** (a) 2D NOESY spectra (500 MHz, DMSO- $d_6$ , room temperature) of **3** with (b) expansion of significant regions showing interactions between adm-1-NH<sub>2</sub> and  $\beta$ -CD.

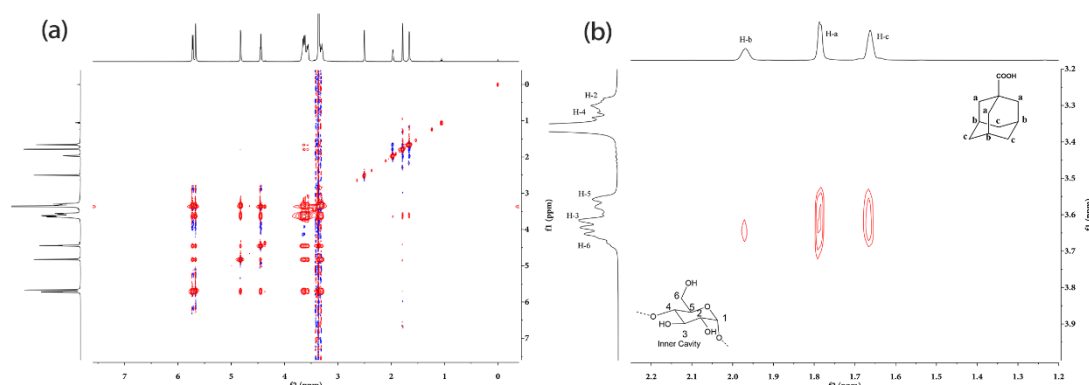

**Figure S16.** (a) 2D NOESY spectra (500 MHz, DMSO-*d*<sub>6</sub>, room temperature) of **4** with (b) expansion of significant regions showing interactions between adm-1-NH<sub>2</sub> and β-CD.

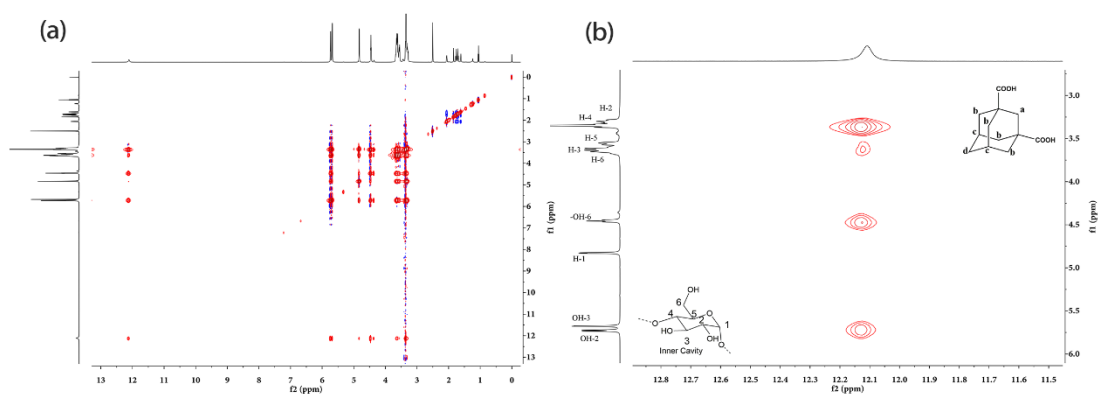

**Figure S17.** (a) 2D NOESY spectra (500 MHz, DMSO-*d*<sub>6</sub>, room temperature) of **5** with (b) expansion of significant regions showing interactions between adm-1,3-diCOOH and β-CD.

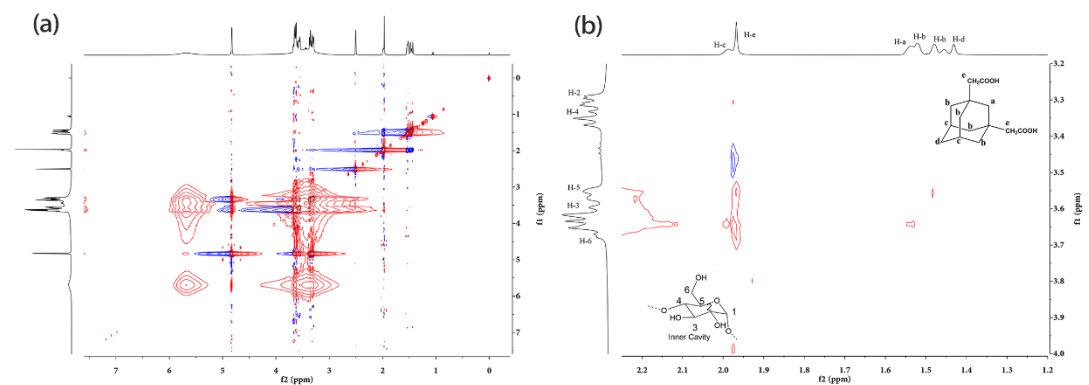

**Figure S18.** (a) 2D NOESY spectra (500 MHz, DMSO-*d*<sub>6</sub>, room temperature) of **6** with (b) expansion of significant regions showing interactions between adm-1,3-diCH<sub>2</sub>COOH and β-CD.

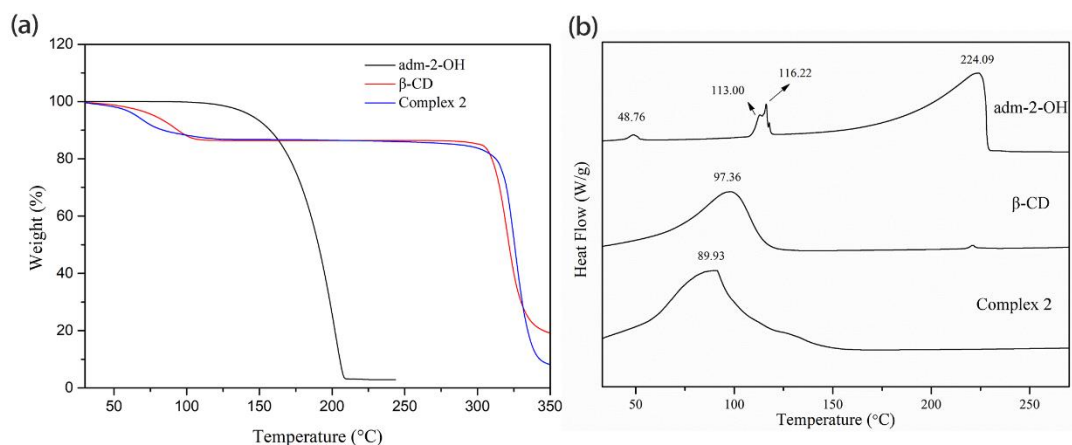

**Figure S19.** (a) TG traces of adm-2-OH,  $\beta$ -CD and **2**. (b) A comparison of the DSC-TGA curves of **2** and its subcomponents  $\beta$ -CD and adm-2-OH, showing the melting point alteration upon complex formation.

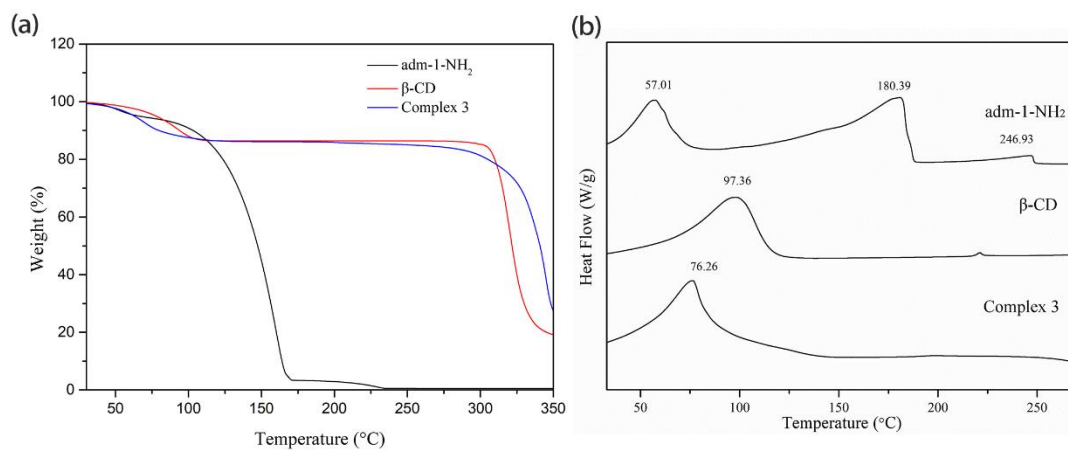

**Figure S20.** (a) TG traces of adm-1-NH<sub>2</sub>,  $\beta$ -CD and **3**. (b) A comparison of the DSC-TGA curves of **3** and its subcomponents  $\beta$ -CD and adm-1-NH<sub>2</sub>, showing the melting point alteration upon complex formation.

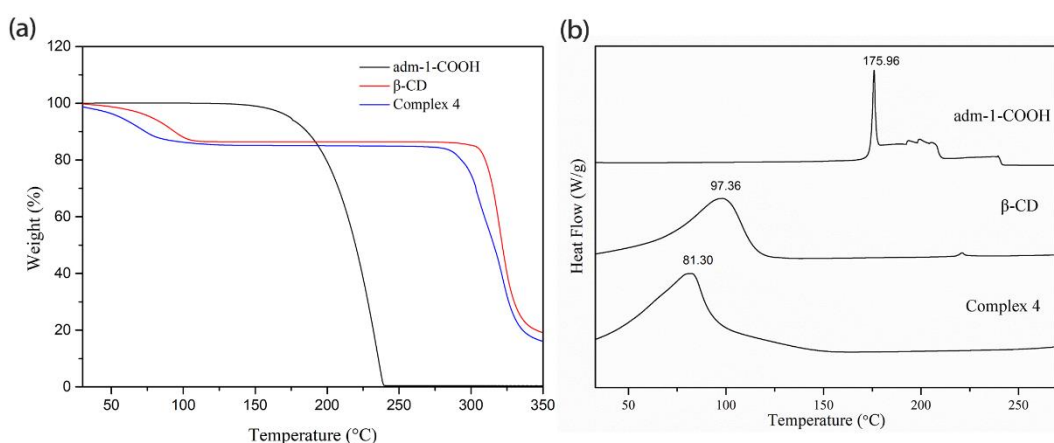

**Figure S21.** (a) TG traces of adm-1-COOH,  $\beta$ -CD and **4**. (b) A comparison of the DSC-TGA curves of **4** and its subcomponents  $\beta$ -CD and adm-1-COOH, showing the melting point alteration upon complex formation.

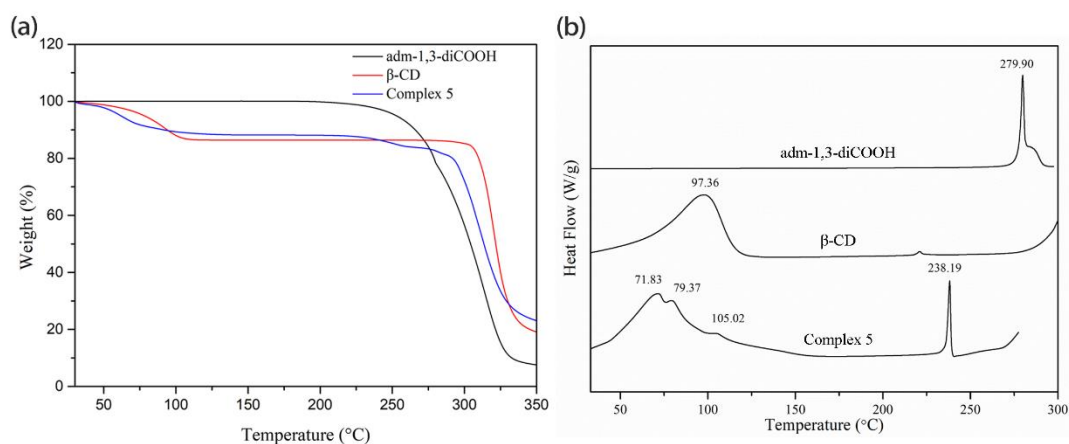

**Figure S22.** (a) TG traces of adm-1,3-diCOOH,  $\beta$ -CD and 5. (b) A comparison of the DSC-TGA curves of 5 and its sub-components  $\beta$ -CD and adm-1,3-diCOOH, showing the melting point alteration upon complex formation.

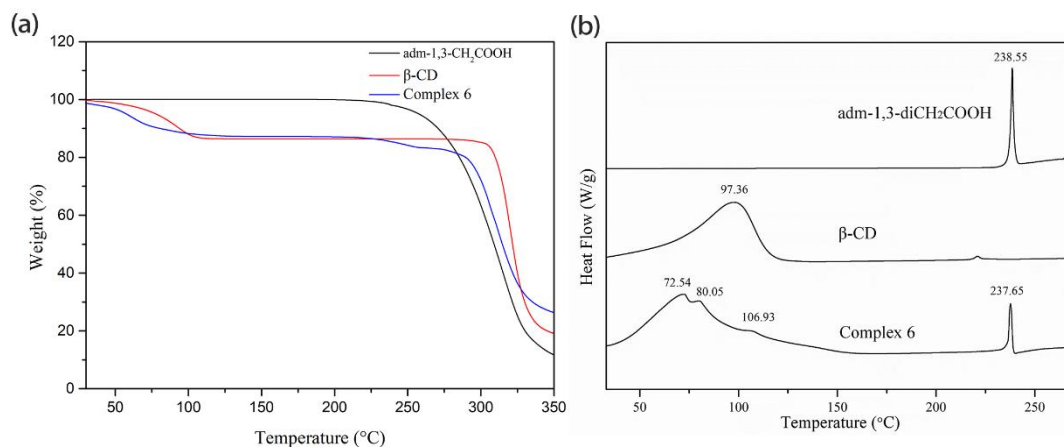

**Figure S23.** (a) TG traces of adm-1,3-diCH<sub>2</sub>COOH,  $\beta$ -CD and 6. (b) A comparison of the DSC-TGA curves of 6 its sub-components  $\beta$ -CD and adm-1,3-diCH<sub>2</sub>COOH, showing the melting point alteration upon complex formation.

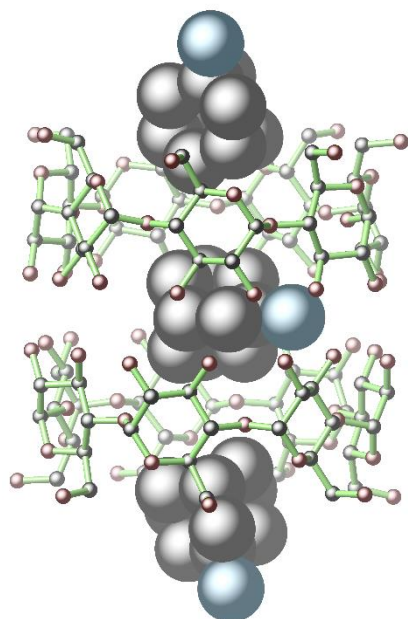

**Figure S24.** The X-ray crystal structure of **3** showing the diverse guest orientations in the inclusion complexes. The guests are presented as a space-filling model. The hydrogen atoms are omitted for clarity. Color codes: O (brown-red), N (blue), C (black).

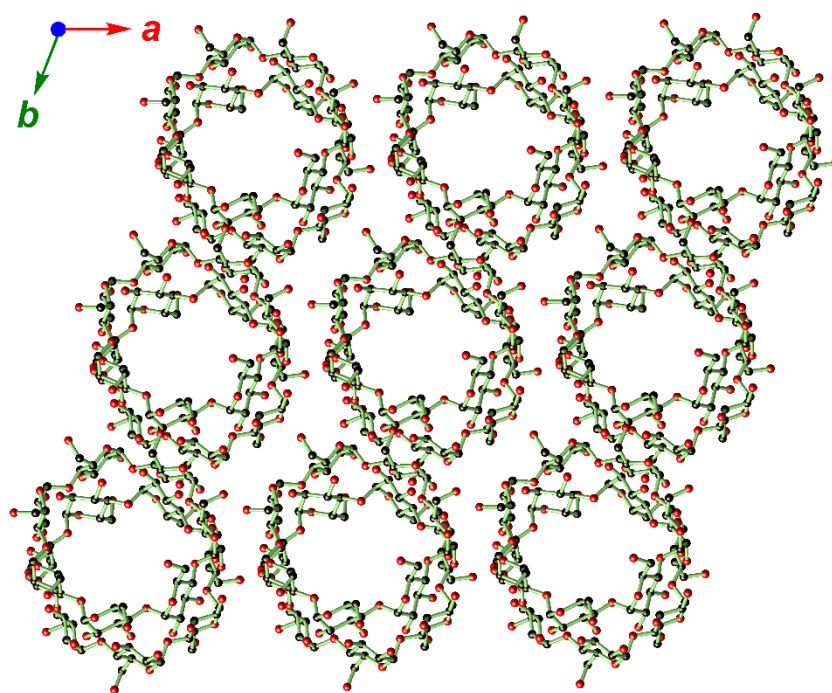

**Figure S25.** The crystal packing diagram of **6** (along *c* direction). Color codes: O (red) and C (gray).

**Table S1.** Chemical shifts of adamantane derivative **1** with/without complexation with  $\beta$ -CD (recorded in DMSO- $d_6$  with TMS as the internal standard) for comparison.

| Adamantane Derivative 1                                                           | Hydrogen | $\delta_{\text{free state}}$ | $\delta_{\text{complexed state}}$ | $\Delta\delta^a$ | Remark   |
|-----------------------------------------------------------------------------------|----------|------------------------------|-----------------------------------|------------------|----------|
| 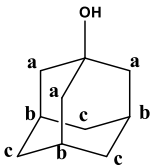 | H-a      | 1.5739                       | 1.5796                            | 0.0057           |          |
|                                                                                   | H-b      | 2.0296                       | 2.0442                            | 0.0146           |          |
|                                                                                   | H-c      | 1.5394                       | 1.5406                            | 0.0012           | no split |
|                                                                                   | -OH      | 4.3049                       | 4.2786                            | -0.0263          |          |

a.  $\Delta\delta = \delta_{\text{complexed state}} - \delta_{\text{free state}}$ .

**Table S2.** Chemical shifts of adamantane derivative **2** with/without complexation with  $\beta$ -CD (recorded in DMSO- $d_6$  with TMS as the internal standard) for comparison.

| Adamantane Derivative 2                                                           | Hydrogen | $\delta_{\text{free state}}$ | $\delta_{\text{complexed state}}$ | $\Delta\delta^a$ | Remark |
|-----------------------------------------------------------------------------------|----------|------------------------------|-----------------------------------|------------------|--------|
| 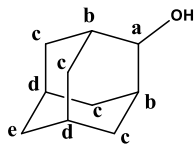 | H-a      | 3.6495                       | 3.6019                            | -0.0476          |        |
|                                                                                   | H-b      | 2.0549                       | 2.0561                            | 0.0012           |        |
|                                                                                   | H-c      | 1.6889                       | 1.6905                            | 0.0016           |        |
|                                                                                   | H-d      | 1.7029                       | Merge with peak of 1.7381         | 0.0352           |        |
|                                                                                   | H-e      | 1.3723                       | 1.3818                            | 0.0095           |        |
|                                                                                   | -OH      | 4.5192                       | 4.4843                            | -0.0349          |        |

a.  $\Delta\delta = \delta_{\text{complexed state}} - \delta_{\text{free state}}$ .

**Table S3.** Chemical shifts of adamantane derivative **3** with/without complexation with  $\beta$ -CD (recorded in DMSO- $d_6$  with TMS as the internal standard) for comparison.

| Adamantane Derivative 3                                                             | Hydrogen | $\delta_{\text{free state}}$ | $\delta_{\text{complexed state}}$ | $\Delta\delta^a$ | Remark |
|-------------------------------------------------------------------------------------|----------|------------------------------|-----------------------------------|------------------|--------|
| 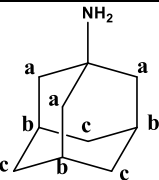 | H-a      | 1.4813                       | 1.4983                            | 0.017            |        |
|                                                                                     | H-b      | 1.9655                       | 1.9987                            | 0.0332           |        |
|                                                                                     | H-c      | 1.5492                       | 1.5573                            | 0.0081           |        |
|                                                                                     | -NH2     | broad                        | disappear                         |                  |        |

a.  $\Delta\delta = \delta_{\text{complexed state}} - \delta_{\text{free state}}$ .

**Table S4.** Chemical shifts of adamantane derivative **4** with/without complexation with  $\beta$ -CD (recorded in DMSO- $d_6$  with TMS as the internal standard) for comparison.

| Adamantane Derivative 4                                                             | Hydrogen | $\delta_{\text{free state}}$ | $\delta_{\text{complexed state}}$ | $\Delta\delta^a$ | Remark   |
|-------------------------------------------------------------------------------------|----------|------------------------------|-----------------------------------|------------------|----------|
| 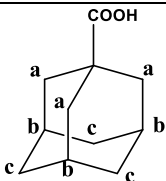 | H-a      | 1.7836                       | 1.7874                            | 0.0038           |          |
|                                                                                     | H-b      | 1.9526                       | 1.9688                            | 0.0162           |          |
|                                                                                     | H-c      | 1.6588                       | 1.6624                            | 0.0036           | no split |
|                                                                                     | -COOH    | 11.9616                      | 11.9389                           | -0.0227          |          |

a.  $\Delta\delta = \delta_{\text{complexed state}} - \delta_{\text{free state}}$ .

**Table S5.** Chemical shifts of adamantane derivative **5** with/without complexation with  $\beta$ -CD (recorded in DMSO- $d_6$  with TMS as the internal standard) for comparison.

| Adamantane Derivative 5                                                             | Hydrogen | $\delta_{\text{free state}}$ | $\delta_{\text{complexed state}}$ | $\Delta\delta^a$ | Remark |
|-------------------------------------------------------------------------------------|----------|------------------------------|-----------------------------------|------------------|--------|
| 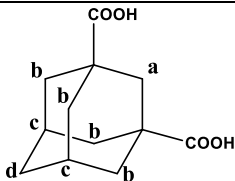 | H-a      | 1.8453                       | 1.8439                            | -0.0014          |        |
|                                                                                     | H-b      | 1.7361                       | 1.7343                            | -0.0018          |        |
|                                                                                     | H-c      | 2.0573                       | 2.0570                            | -0.0003          |        |
|                                                                                     | H-d      | 1.6132                       | 1.6119                            | -0.0013          |        |
|                                                                                     | -COOH    | 12.1117                      | 12.1087                           | -0.0030          |        |

a.  $\Delta\delta = \delta_{\text{complexed state}} - \delta_{\text{free state}}$ .

**Table S6.** Chemical shifts of adamantane derivative **6** with/without complexation with  $\beta$ -CD (recorded in DMSO- $d_6$  with TMS as the internal standard) for comparison.

| Adamantane Derivative <b>6</b>                                                    | Hydrogen | $\delta_{\text{free state}}$ | $\delta_{\text{complexed state}}$ | $\Delta\delta^a$ | Remark              |
|-----------------------------------------------------------------------------------|----------|------------------------------|-----------------------------------|------------------|---------------------|
| 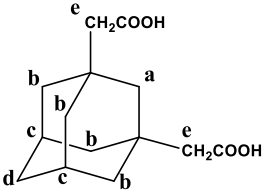 | H-a      | 1.5392                       | 1.5396                            | 0.0004           | Merge with peak H-b |
|                                                                                   | H-b      | 1.5011                       | 1.5003                            | -0.0008          |                     |
|                                                                                   | H-c      | 1.9866                       | 1.9873                            | 0.0007           |                     |
|                                                                                   | H-d      | 1.4352                       | 1.4311                            | -0.0041          |                     |
|                                                                                   | H-e      | 1.9692                       | 1.9674                            | -0.0018          |                     |
|                                                                                   | -COOH    | 11.8876                      | 11.8325                           | -0.0551          |                     |

a.  $\Delta\delta = \delta_{\text{complexed state}} - \delta_{\text{free state}}$

**Table S7.** Chemical shifts of  $\beta$ -CD in **1** with/without complexation with adamantane derivative (recorded in DMSO- $d_6$  with TMS as the internal standard) for comparison.

| Complex <b>1</b>                                                                   | Hydrogen | $\delta_{\text{free state}}$ | $\delta_{\text{complexed state}}$ | $\Delta\delta^a$ | Remark |
|------------------------------------------------------------------------------------|----------|------------------------------|-----------------------------------|------------------|--------|
| 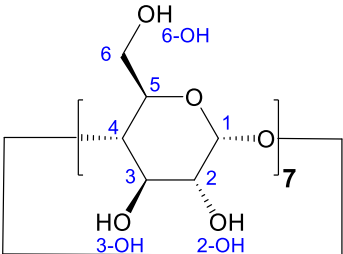 | H-1      | 4.8270                       | 4.8231                            | -0.0039          |        |
|                                                                                    | H-2      | /                            | /                                 |                  |        |
|                                                                                    | H-3      | 3.6117                       | 3.6161                            | 0.0044           |        |
|                                                                                    | H-4      | /                            | /                                 |                  |        |
|                                                                                    | H-5      | 3.5581                       | 3.5614                            | 0.0033           |        |
|                                                                                    | H-6      | /                            | /                                 |                  |        |
|                                                                                    | 2-OH     | 5.7392                       | 5.7189                            | -0.0203          |        |
|                                                                                    | 3-OH     | 5.6841                       | 5.6632                            | -0.0209          |        |
|                                                                                    | 6-OH     | 4.4690                       | 4.4511                            | -0.0179          |        |

a.  $\Delta\delta = \delta_{\text{complexed state}} - \delta_{\text{free state}}$ .

**Table S8.** Chemical shifts of  $\beta$ -CD in **2** with/without complexation with adamantane derivative (recorded in DMSO- $d_6$  with TMS as the internal standard) for comparison.

| Complex <b>2</b>                                                                    | Hydrogen | $\delta_{\text{free state}}$ | $\delta_{\text{complexed state}}$ | $\Delta\delta^a$ | Remark                     |
|-------------------------------------------------------------------------------------|----------|------------------------------|-----------------------------------|------------------|----------------------------|
| 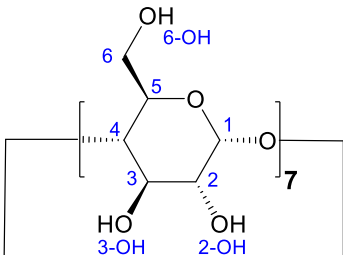 | H-1      | 4.8270                       | 4.8231                            | -0.0039          |                            |
|                                                                                     | H-2      | /                            | /                                 |                  |                            |
|                                                                                     | H-3      | 3.6117                       | 3.6196                            | 0.0079           |                            |
|                                                                                     | H-4      | /                            | /                                 |                  |                            |
|                                                                                     | H-5      | 3.5581                       | 3.5597                            | 0.0016           |                            |
|                                                                                     | H-6      | /                            | /                                 |                  |                            |
|                                                                                     | 2-OH     | 5.7392                       | 5.7165                            | -0.0227          |                            |
|                                                                                     | 3-OH     | 5.6841                       | 5.6616                            | -0.0225          | Doblet to siglet           |
|                                                                                     | 6-OH     | 4.4690                       | 4.4497                            | -0.0193          | Triplet to pro-siglet peak |

a.  $\Delta\delta = \delta_{\text{complexed state}} - \delta_{\text{free state}}$ .

**Table S9.** Chemical shifts of  $\beta$ -CD in **3** with/without complexation with adamantane derivative (recorded in DMSO- $d_6$  with TMS as the internal standard) for comparison.

| Complex 3                                                                         | Hydrogen | $\delta_{\text{free state}}$ | $\delta_{\text{complexed state}}$ | $\Delta\delta^a$ | Remark              |
|-----------------------------------------------------------------------------------|----------|------------------------------|-----------------------------------|------------------|---------------------|
| 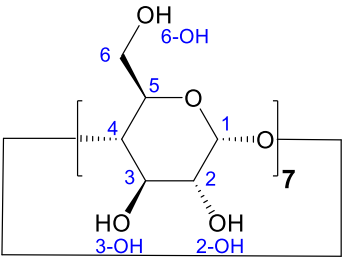 | H-1      | 4.8270                       | 4.8168                            | -0.0102          |                     |
|                                                                                   | H-2      | /                            | /                                 |                  |                     |
|                                                                                   | H-3      | 3.6117                       | 3.6220                            | 0.0103           |                     |
|                                                                                   | H-4      | /                            | /                                 |                  |                     |
|                                                                                   | H-5      | 3.5581                       | 3.5598                            | 0.0017           |                     |
|                                                                                   | H-6      | /                            | /                                 |                  |                     |
|                                                                                   | 2-OH     | 5.7392                       | 5.7116                            | -0.0276          | Fused into one peak |
|                                                                                   | 3-OH     | 5.6841                       | 5.7116                            | 0.0275           |                     |
|                                                                                   | 6-OH     | 4.4690                       | 4.4829                            | 0.0139           | Doublet to singlet  |

a.  $\Delta\delta = \delta_{\text{complexed state}} - \delta_{\text{free state}}$ .

**Table S10.** Chemical shifts of  $\beta$ -CD in **4** with/without complexation with adamantane derivative (recorded in DMSO- $d_6$  with TMS as the internal standard) for comparison.

| Complex 4                                                                          | Hydrogen | $\delta_{\text{free state}}$ | $\delta_{\text{complexed state}}$ | $\Delta\delta^a$ | Remark                  |
|------------------------------------------------------------------------------------|----------|------------------------------|-----------------------------------|------------------|-------------------------|
| 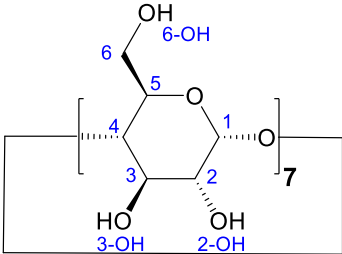 | H-1      | 4.8270                       | 4.8237                            | -0.0033          |                         |
|                                                                                    | H-2      | /                            | /                                 |                  |                         |
|                                                                                    | H-3      | 3.6117                       | 3.6145                            | 0.0028           |                         |
|                                                                                    | H-4      | /                            | /                                 |                  |                         |
|                                                                                    | H-5      | 3.5581                       | 3.5689                            | 0.0108           |                         |
|                                                                                    | H-6      | /                            | /                                 |                  |                         |
|                                                                                    | 2-OH     | 5.7392                       | 5.7214                            | -0.0178          | Doublet peak to singlet |
|                                                                                    | 3-OH     | 5.6841                       | 5.6677                            | -0.0164          |                         |
|                                                                                    | 6-OH     | 4.4690                       | 4.4445                            | -0.0245          |                         |

a.  $\Delta\delta = \delta_{\text{complexed state}} - \delta_{\text{free state}}$ .

**Table S11.** Chemical shifts of  $\beta$ -CD in **5** with/without complexation with adamantane derivative (recorded in DMSO- $d_6$  with TMS as the internal standard) for comparison.

| Complex 5                                                                           | Hydrogen | $\delta_{\text{free state}}$ | $\delta_{\text{complexed state}}$ | $\Delta\delta^a$ | Remark               |
|-------------------------------------------------------------------------------------|----------|------------------------------|-----------------------------------|------------------|----------------------|
| 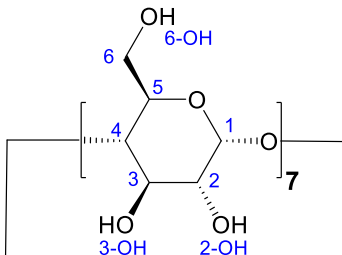 | H-1      | 4.8270                       | 4.8272                            | 0.0002           |                      |
|                                                                                     | H-2      | /                            | /                                 |                  |                      |
|                                                                                     | H-3      | 3.6117                       | 3.6134                            | 0.0017           |                      |
|                                                                                     | H-4      | /                            | /                                 |                  |                      |
|                                                                                     | H-5      | 3.5581                       | 3.5597                            | 0.0016           |                      |
|                                                                                     | H-6      | /                            | /                                 |                  |                      |
|                                                                                     | 2-OH     | 5.7392                       | 5.7283                            | -0.0109          | No peak shape change |
|                                                                                     | 3-OH     | 5.6841                       | 5.6759                            | -0.0082          |                      |
|                                                                                     | 6-OH     | 4.4690                       | 4.4559                            | -0.0131          |                      |

a.  $\Delta\delta = \delta_{\text{complexed state}} - \delta_{\text{free state}}$ .



**Table S12.** Chemical shifts of  $\beta$ -CD in **6** with/without complexation with adamantane derivative (recorded in DMSO- $d_6$  with TMS as the internal standard) for comparison.

| Complex <b>6</b>                                                                  | Hydrogen | $\delta_{\text{free state}}$ | $\delta_{\text{complexed state}}$ | $\Delta\delta^a$ | Remark              |
|-----------------------------------------------------------------------------------|----------|------------------------------|-----------------------------------|------------------|---------------------|
| 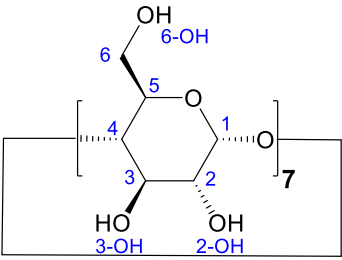 | H-1      | 4.8270                       | 4.8272                            | 0.0002           |                     |
|                                                                                   | H-2      | /                            | /                                 |                  |                     |
|                                                                                   | H-3      | 3.6117                       | 3.6168                            | 0.0051           |                     |
|                                                                                   | H-4      | /                            | /                                 |                  |                     |
|                                                                                   | H-5      | 3.5581                       | 3.5616                            | 0.0035           |                     |
|                                                                                   | H-6      | /                            | /                                 |                  |                     |
|                                                                                   | 2-OH     | 5.7392                       | 5.6927                            | -0.0465          | Fused into one peak |
|                                                                                   | 3-OH     | 5.6841                       | 5.6927                            | 0.0086           |                     |
|                                                                                   | 6-OH     | 4.4690                       | vanish                            | 0.0002           |                     |

a.  $\Delta\delta = \delta_{\text{complexed state}} - \delta_{\text{free state}}$ .
